# Supplementary material for: Effects of regional climatic conditions on the wing morphometrics of the dengue vector Aedes aegypti (Diptera: Culicidae) in India
Source: Research Square preprint supplement (doi:10.21203/rs.3.rs-7937635/v1), 2025-11-18
Supplement: Supplementary file 1 [file 5f5092902bfbcde610ba0cc6.xlsx]

## Sheet: Sheet1
ID	Species	Population	Trapping_site	Site code	Latitude	Longitude	X1	Y1	X2	Y2	X3	Y3	X4	Y4	X5	Y5	X6	Y6	X7	Y7	X8	Y8	X9	Y9	X10	Y10	X11	Y11	X12	Y12	X13	Y13	X14	Y14	X15	Y15	X16	Y16	X17	Y17	X18	Y18	centroid_size
aeg 2	Ae.aegypti	Jodhpur	Killi Khana	JD_01	26°17'45.1"N	73°01'23.0"E	3.547	1.649	5.052	1.864	5.143	1.956	5.228	2.133	5.189	2.277	4.993	2.421	4.672	2.545	4.194	2.643	3.638	2.728	2.957	2.787	2.519	2.237	3.075	2.218	3.199	2.1	3.37	2.12	3.37	2.054	3.298	1.989	3.697	1.93	3.9	2.237	3.85871
aeg 3	Ae.aegypti	Jodhpur	Killi Khana	JD_01	26°17'45.1"N	73°01'23.0"E	3.809	1.859	5.248	2.192	5.398	2.316	5.418	2.512	5.372	2.637	5.15	2.754	4.855	2.839	4.364	2.905	3.841	2.964	3.049	2.918	2.676	2.381	3.33	2.421	3.337	2.296	3.54	2.329	3.612	2.25	3.572	2.192	4.037	2.139	4.122	2.519	3.87285
aeg 4	Ae.aegypti	Jodhpur	Sardarpura	JD_02	26°16'40.7"N	73°0'123.3"E	2.873	1.603	4.299	1.72	4.443	1.838	4.521	1.969	4.495	2.1	4.345	2.25	4.07	2.349	3.716	2.427	3.239	2.525	2.604	2.584	2.218	2.146	2.761	2.12	2.774	2.002	2.977	1.995	3.01	1.93	2.951	1.858	3.448	1.825	3.494	2.126	3.26681
aeg 5	Ae.aegypti	Jodhpur	Sardarpura	JD_02	26°16'40.7"N	73°0'123.3"E	2.932	1.852	4.188	1.897	4.299	2.008	4.384	2.152	4.377	2.277	4.233	2.408	3.991	2.532	3.644	2.61	3.213	2.696	2.702	2.748	2.309	2.342	2.794	2.329	2.8	2.218	2.983	2.231	2.983	2.159	2.931	2.093	3.343	2.048	3.461	2.329	2.96637
aeg 6	Ae.aegypti	Jodhpur	Sardarpura	JD_02	26°16'40.7"N	73°0'123.3"E	3.482	1.492	4.822	1.622	4.966	1.733	5.025	1.871	5.019	2.002	4.888	2.133	4.633	2.25	4.233	2.336	3.756	2.421	3.206	2.466	2.728	2.015	3.265	2.008	3.265	1.91	3.494	1.891	3.54	1.832	3.468	1.779	3.985	1.727	3.972	2.028	3.25303
aeg 7	Ae.aegypti	Jodhpur	Sardarpura	JD_02	26°16'40.7"N	73°0'123.3"E	3.325	1.558	4.449	1.668	4.535	1.74	4.607	1.891	4.613	2.008	4.476	2.12	4.214	2.25	3.887	2.342	3.481	2.427	2.859	2.46	2.571	2.061	3.016	2.048	3.01	1.963	3.186	1.982	3.232	1.91	3.186	1.851	3.618	1.766	3.677	2.054	2.95448
aeg 8	Ae.aegypti	Jodhpur	Rotri Circle	JD_03	26°16'10.9"N	73°0'53.63"E	2.952	1.492	4.561	1.655	4.679	1.786	4.705	1.93	4.685	2.048	4.548	2.172	4.292	2.309	3.828	2.414	3.33	2.512	2.578	2.617	2.211	2.139	2.839	2.093	2.833	1.956	2.983	1.963	2.997	1.891	2.918	1.845	3.402	1.76	3.592	2.087	3.63777
aeg 9	Ae.aegypti	Jodhpur	Rotri Circle	JD_03	26°16'10.9"N	73°0'53.63"E	3.632	1.414	5.104	1.642	5.248	1.753	5.313	1.917	5.248	2.067	5.084	2.185	4.803	2.316	4.43	2.401	3.854	2.466	3.154	2.525	2.722	2.002	3.357	2.008	3.402	1.877	3.586	1.884	3.605	1.825	3.514	1.727	4.024	1.694	4.122	2.021	3.63377
aeg 10	Ae.aegypti	Jodhpur	Rotri Circle	JD_03	26°16'10.9"N	73°0'53.63"E	3.534	2.094	4.999	2.283	5.11	2.414	5.156	2.565	5.13	2.669	4.966	2.807	4.731	2.911	4.305	3.023	3.769	3.141	3.062	3.239	2.604	2.761	3.186	2.702	3.193	2.597	3.402	2.617	3.468	2.525	3.357	2.466	3.802	2.362	4.037	2.741	3.65973
aeg 11	Ae.aegypti	Jodhpur	Rotri Circle	JD_03	26°16'10.9"N	73°0'53.63"E	3.527	2.101	4.822	2.296	4.934	2.394	5.038	2.552	5.025	2.656	4.888	2.807	4.62	2.938	4.201	3.042	3.631	3.141	2.964	3.239	2.512	2.748	3.069	2.722	3.069	2.584	3.324	2.597	3.304	2.519	3.206	2.434	3.723	2.394	3.874	2.722	3.6269
aeg 12	Ae.aegypti	Jodhpur	Shastri nagar	JD_04	26°16'8.9"N	72°59'53.30"E	3.671	1.001	5.196	1.19	5.32	1.295	5.372	1.432	5.353	1.563	5.196	1.701	4.894	1.851	4.476	1.949	3.965	2.067	3.193	2.12	2.905	1.622	3.468	1.609	3.487	1.478	3.664	1.485	3.723	1.413	3.631	1.328	4.148	1.262	4.273	1.616	3.59971
aeg 13	Ae.aegypti	Jodhpur	Shastri nagar	JD_04	26°16'8.9"N	72°59'53.30"E	3.508	1.047	5.032	1.275	5.163	1.367	5.176	1.498	5.176	1.635	4.993	1.766	4.724	1.91	4.332	2.035	3.802	2.146	3.055	2.179	2.722	1.655	3.285	1.648	3.304	1.531	3.5	1.544	3.546	1.465	3.468	1.36	4.031	1.315	4.116	1.681	3.59293
aeg 14	Ae.aegypti	Jodhpur	Shastri nagar	JD_04	26°16'8.9"N	72°59'53.30"E	3.874	1.171	5.398	1.341	5.49	1.432	5.582	1.583	5.562	1.707	5.398	1.845	5.084	1.976	4.626	2.087	4.168	2.231	3.422	2.309	3.082	1.799	3.69	1.792	3.71	1.675	3.874	1.668	3.939	1.583	3.834	1.485	4.404	1.413	4.463	1.779	3.57962
aeg 15	Ae.aegypti	Jodhpur	Shastri nagar	JD_04	26°16'8.9"N	72°59'53.30"E	3.521	1.106	4.914	1.334	5.065	1.452	5.091	1.576	5.065	1.688	4.888	1.832	4.646	1.93	4.266	2.021	3.821	2.08	3.082	2.074	2.813	1.622	3.363	1.642	3.376	1.537	3.52	1.531	3.579	1.485	3.514	1.387	4.024	1.36	4.083	1.707	3.28165
aeg 16	Ae.aegypti	Jodhpur	Ratanada	JD_05	26°16'26.0"N	73°01'50.5"E	3.743	2.042	5.339	2.25	5.51	2.362	5.575	2.532	5.555	2.65	5.425	2.768	5.124	2.911	4.607	3.01	4.076	3.095	3.252	3.186	2.761	2.597	3.429	2.584	3.435	2.493	3.631	2.506	3.664	2.447	3.553	2.349	4.096	2.316	4.305	2.689	4.0172
aeg 17	Ae.aegypti	Jodhpur	Ratanada	JD_05	26°16'26.0"N	73°01'50.5"E	3.586	2.042	5.326	2.283	5.49	2.401	5.569	2.591	5.549	2.748	5.385	2.925	5.078	3.075	4.567	3.154	4.063	3.252	3.285	3.298	2.676	2.663	3.383	2.669	3.389	2.538	3.579	2.565	3.638	2.493	3.566	2.388	4.142	2.362	4.305	2.781	4.11724
aeg 18	Ae.aegypti	Jodhpur	Ratanada	JD_05	26°16'26.0"N	73°01'50.5"E	3.442	1.512	4.914	1.747	5.058	1.891	5.163	2.061	5.143	2.152	4.953	2.303	4.633	2.408	4.188	2.473	3.703	2.512	3.042	2.571	2.656	2.041	3.245	2.054	3.265	1.943	3.461	1.963	3.494	1.897	3.415	1.819	3.893	1.805	4.096	2.172	3.54008
aeg 19	Ae.aegypti	Jodhpur	Ratanada	JD_05	26°16'26.0"N	73°01'50.5"E	3.442	2.035	4.993	2.152	5.13	2.257	5.254	2.434	5.215	2.538	5.045	2.682	4.783	2.8	4.312	2.898	3.808	3.016	3.114	3.114	2.709	2.624	3.298	2.565	3.298	2.46	3.507	2.466	3.54	2.408	3.494	2.329	4.024	2.257	4.116	2.597	3.60453
aeg 20	Ae.aegypti	Jodhpur	Shankar Nagar	JD_06	26°14'49.074"N	72°58'6.05"E	3.331	1.963	4.836	2.107	4.973	2.218	5.038	2.368	5.038	2.512	4.816	2.669	4.574	2.8	4.181	2.892	3.592	2.97	2.898	3.003	2.525	2.545	3.147	2.525	3.16	2.421	3.33	2.421	3.402	2.355	3.304	2.264	3.749	2.218	3.919	2.552	3.58031
aeg 21	Ae.aegypti	Jodhpur	Shankar Nagar	JD_06	26°14'49.074"N	72°58'6.05"E	3.357	1.944	4.862	2.12	4.98	2.218	5.032	2.394	4.999	2.525	4.836	2.65	4.541	2.754	4.116	2.839	3.546	2.918	2.885	3.003	2.466	2.558	3.036	2.506	3.049	2.421	3.239	2.408	3.252	2.336	3.154	2.257	3.73	2.205	3.86	2.545	3.68872
aeg 22	Ae.aegypti	Jodhpur	Shankar Nagar	JD_06	26°14'49.074"N	72°58'6.05"E	3.305	1.976	4.829	2.237	4.98	2.368	5.058	2.532	5.019	2.663	4.816	2.807	4.554	2.911	4.148	2.983	3.605	3.036	2.911	3.016	2.532	2.499	3.134	2.532	3.16	2.401	3.357	2.421	3.402	2.362	3.337	2.283	3.834	2.25	3.926	2.643	3.57684
aeg 27	Ae.aegypti	Jodhpur	Dada Dadi Park	JD_07	26°15'45.083"N	72°58'4.51"E	3.423	1.95	4.672	2.172	4.777	2.277	4.855	2.44	4.836	2.552	4.672	2.65	4.391	2.754	4.076	2.846	3.592	2.944	3.01	2.964	2.637	2.499	3.167	2.506	3.186	2.421	3.304	2.414	3.324	2.349	3.206	2.25	3.769	2.224	3.815	2.545	3.17918
aeg 28	Ae.aegypti	Kota	R K Puram	KT_01	25°07'39.0"N	75°49'32.9"E	4.429	2.056	6.001	2.231	6.168	2.354	6.247	2.538	6.212	2.732	5.992	2.881	5.684	3.066	5.245	3.171	4.647	3.321	3.769	3.382	3.373	2.758	4.076	2.776	4.111	2.653	4.296	2.644	4.331	2.547	4.234	2.424	4.885	2.363	4.964	2.776	4.10594
aeg 29	Ae.aegypti	Kota	R K Puram	KT_01	25°07'39.0"N	75°49'32.9"E	4.798	2.355	7.082	2.503	7.231	2.644	7.345	2.846	7.31	3.013	7.064	3.224	6.748	3.435	6.203	3.593	5.509	3.76	4.753	3.9	3.936	3.233	4.718	3.18	4.753	3.039	4.946	3.004	4.99	2.899	4.867	2.811	5.623	2.679	5.658	3.118	4.91608
aeg 30	Ae.aegypti	Kota	R K Puram	KT_01	25°07'39.0"N	75°49'32.9"E	4.605	3.445	6.651	3.637	6.8	3.777	6.923	4.006	6.932	4.182	6.704	4.393	6.326	4.568	5.781	4.718	5.087	4.876	4.041	4.981	3.487	4.296	4.331	4.243	4.357	4.076	4.551	4.085	4.586	3.988	4.48	3.857	5.183	3.795	5.315	4.278	4.95567
aeg 31	Ae.aegypti	Kota	Kunhari	KT_02	25°12'19.1"N	75°50'09.6"E	3.573	1.558	4.881	1.675	5.025	1.792	5.091	1.923	5.091	2.021	4.921	2.185	4.665	2.303	4.26	2.434	3.782	2.552	3.069	2.545	2.584	2.113	3.016	2.087	2.977	1.995	3.396	2.008	3.448	1.943	3.422	1.871	4.044	1.799	4.083	2.139	3.60369
aeg 32	Ae.aegypti	Kota	Kunhari	KT_02	25°12'19.1"N	75°50'09.6"E	3.213	1.695	4.724	1.864	4.894	1.976	4.953	2.159	4.927	2.264	4.757	2.375	4.482	2.512	4.083	2.597	3.586	2.689	2.938	2.735	2.493	2.244	2.918	2.211	2.898	2.139	3.258	2.172	3.304	2.067	3.252	1.976	3.9	1.969	3.978	2.296	3.57633
aeg 33	Ae.aegypti	Kota	Borkheda	KT_03	25°10'41.9"N	75°53'06.0"E	3.24	2.173	4.515	2.506	4.6	2.63	4.587	2.774	4.535	2.885	4.384	3.01	4.175	3.121	3.795	3.245	3.304	3.383	2.682	3.429	2.25	2.872	2.807	2.853	2.833	2.748	3.016	2.748	3.042	2.65	2.97	2.571	3.684	2.532	3.54	2.866	3.39574
aeg 34	Ae.aegypti	Kota	Borkheda	KT_03	25°10'41.9"N	75°53'06.0"E	3.03	2.251	4.155	2.414	4.24	2.532	4.253	2.65	4.214	2.722	4.057	2.8	3.808	2.879	3.5	2.964	3.167	3.023	2.663	3.036	2.48	2.741	2.866	2.676	2.866	2.617	3.069	2.624	3.127	2.565	3.062	2.512	3.559	2.473	3.487	2.715	2.54987
aeg 36	Ae.aegypti	Kota	Borkheda	KT_03	25°10'41.9"N	75°53'06.0"E	3.429	1.466	4.423	1.74	4.502	1.851	4.495	1.976	4.469	2.048	4.286	2.133	4.057	2.172	3.73	2.224	3.337	2.257	2.839	2.224	2.741	1.943	3.114	1.884	3.101	1.819	3.343	1.832	3.376	1.766	3.337	1.707	3.808	1.714	3.756	1.976	2.56899
aeg 37	Ae.aegypti	Nagpur	Kimaya hospital	NG_01	21°09'04.18"N	79°06'7.07"E	4.376	2.821	5.869	2.969	5.983	3.092	6.08	3.268	6.071	3.435	5.869	3.602	5.535	3.76	5.078	3.909	4.524	4.085	3.795	4.182	3.259	3.567	3.918	3.549	3.936	3.4	4.138	3.408	4.173	3.312	3.971	3.197	4.726	3.127	4.841	3.549	4.06509
aeg 38	Ae.aegypti	Nagpur	Kimaya hospital	NG_01	21°09'04.18"N	79°06'7.07"E	4.016	2.531	5.79	2.67	5.939	2.793	6.045	2.969	5.974	3.154	5.772	3.338	5.438	3.496	4.955	3.628	4.331	3.777	3.619	3.9	3.031	3.312	3.707	3.241	3.672	3.127	3.936	3.118	4.006	3.039	3.927	2.916	4.507	2.811	4.586	3.241	4.29642
aeg 39	Ae.aegypti	Nagpur	Kimaya hospital	NG_01	21°09'04.18"N	79°06'7.07"E	6.037	2.434	7.565	2.723	7.697	2.864	7.776	3.048	7.758	3.233	7.503	3.408	7.161	3.558	6.633	3.619	5.957	3.707	5.087	3.751	4.568	3.118	5.306	3.154	5.342	3.013	5.526	3.031	5.596	2.925	5.491	2.793	6.141	2.767	6.291	3.206	4.55714
aeg 40	Ae.aegypti	Nagpur	Kimaya hospital	NG_01	21°09'04.18"N	79°06'7.07"E	4.508	1.854	6.379	2.055	6.519	2.178	6.607	2.354	6.581	2.556	6.379	2.732	5.983	2.934	5.526	3.013	4.876	3.136	4.138	3.215	3.575	2.591	4.296	2.582	4.322	2.424	4.489	2.433	4.595	2.336	4.472	2.231	5.113	2.152	5.166	2.6	4.34611
aeg 42	Ae.aegypti	Nagpur	Yadav Flour mill	NG_02	21°09'04.1"N	79°05'39.5"E	5.062	3.19	6.888	3.47	7.02	3.619	7.108	3.76	7.055	3.909	6.862	4.085	6.51	4.27	6.018	4.393	5.35	4.489	4.524	4.533	4.041	3.918	4.788	3.936	4.806	3.777	5.034	3.795	5.078	3.698	4.999	3.593	5.816	3.558	5.772	4.024	4.35405
aeg 43	Ae.aegypti	Nagpur	Yadav Flour mill	NG_02	21°09'04.1"N	79°05'39.5"E	4.051	2.654	5.57	2.723	5.737	2.846	5.842	2.995	5.816	3.171	5.623	3.312	5.306	3.487	4.893	3.637	4.349	3.804	3.593	3.918	3.048	3.391	3.681	3.347	3.681	3.189	4.05	3.206	4.138	3.11	4.015	3.022	4.551	2.943	4.674	3.329	3.90563
aeg 44	Ae.aegypti	Nagpur	Yadav Flour mill	NG_02	21°09'04.1"N	79°05'39.5"E	3.998	2.583	5.676	2.864	5.799	2.96	5.904	3.171	5.878	3.303	5.649	3.47	5.377	3.628	4.902	3.76	4.155	3.865	3.408	3.944	2.934	3.321	3.646	3.338	3.69	3.145	3.865	3.206	3.883	3.092	3.769	2.969	4.472	2.943	4.612	3.356	4.25756
aeg 45	Ae.aegypti	Nagpur	Yadav Flour mill	NG_02	21°09'04.1"N	79°05'39.5"E	4.236	2.759	6.001	3.013	6.132	3.162	6.203	3.338	6.15	3.496	5.966	3.637	5.667	3.777	5.192	3.909	4.48	4.032	3.514	4.059	3.197	3.479	3.953	3.496	3.988	3.329	4.164	3.364	4.19	3.241	4.067	3.118	4.779	3.092	4.902	3.523	4.32968
aeg 46	Ae.aegypti	Nagpur	Yadav Flour mill	NG_02	21°09'04.1"N	79°05'39.5"E	4.455	2.487	6.08	2.793	6.273	2.943	6.317	3.083	6.264	3.268	6.036	3.417	5.658	3.549	5.192	3.646	4.595	3.69	3.804	3.69	3.487	3.136	4.155	3.171	4.19	3.048	4.366	3.074	4.401	2.978	4.357	2.864	4.955	2.837	4.981	3.25	4.03739
aeg 47	Ae.aegypti	Nagpur	Yadav Flour mill	NG_02	21°09'04.1"N	79°05'39.5"E	4.921	2.302	6.572	2.661	6.695	2.837	6.739	3.004	6.695	3.145	6.449	3.303	6.08	3.417	5.649	3.505	5.025	3.531	4.313	3.531	3.9	2.951	4.577	3.013	4.63	2.864	4.788	2.908	4.823	2.802	4.735	2.679	5.315	2.635	5.421	3.101	4.05232
aeg 49	Ae.aegypti	Nagpur	Nimbus infratech Pvt. Ltd.	NG_03	21°07'36.14"N	79°06'9.468"E	4.227	2.03	6.141	2.319	6.264	2.442	6.352	2.644	6.308	2.828	6.045	3.013	5.64	3.171	5.183	3.294	4.454	3.373	3.619	3.435	3.083	2.749	3.874	2.793	3.865	2.609	4.041	2.635	4.103	2.556	4.024	2.415	4.595	2.389	4.718	2.828	4.66886
aeg 50	Ae.aegypti	Nagpur	Nimbus infratech Pvt. Ltd.	NG_03	21°07'36.14"N	79°06'9.468"E	4.025	1.432	5.886	1.748	6.027	1.888	6.089	2.082	6.097	2.24	5.799	2.415	5.386	2.6	4.858	2.741	4.147	2.846	3.321	2.934	2.82	2.231	3.567	2.266	3.567	2.09	3.83	2.143	3.883	2.011	3.707	1.879	4.252	1.809	4.48	2.301	4.73354
aeg 51	Ae.aegypti	Nagpur	Nimbus infratech Pvt. Ltd.	NG_03	21°07'36.14"N	79°06'9.468"E	4.517	1.898	6.633	2.02	6.765	2.161	6.827	2.354	6.765	2.53	6.554	2.723	6.15	2.96	5.658	3.083	4.999	3.241	4.085	3.382	3.505	2.749	4.296	2.705	4.296	2.538	4.542	2.547	4.577	2.459	4.41	2.328	5.139	2.213	5.166	2.714	4.78987
aeg 52	Ae.aegypti	Nagpur	S D Hospital, Nagpur	NG_04	21°08'17.0"N	79°06'58.0"E	4.455	1.696	6.159	1.853	6.308	1.967	6.405	2.152	6.414	2.319	6.168	2.547	5.825	2.714	5.35	2.846	4.691	2.987	3.848	3.136	3.154	2.495	3.962	2.459	3.988	2.336	4.208	2.319	4.27	2.231	3.98	2.117	4.823	2.029	4.973	2.442	4.59441
aeg 53	Ae.aegypti	Nagpur	S D Hospital, Nagpur	NG_04	21°08'17.0"N	79°06'58.0"E	4.666	1.924	6.519	2.125	6.651	2.275	6.668	2.442	6.633	2.644	6.44	2.802	6.097	2.934	5.596	3.013	4.964	3.057	4.234	3.118	3.777	2.565	4.445	2.556	4.454	2.398	4.595	2.424	4.674	2.371	4.603	2.266	5.227	2.24	5.306	2.635	4.2079
aeg 54	Ae.aegypti	Nagpur	S D Hospital, Nagpur	NG_04	21°08'17.0"N	79°06'58.0"E	4.982	3.243	6.66	3.567	6.792	3.681	6.862	3.883	6.862	4.032	6.66	4.226	6.291	4.428	5.816	4.56	5.104	4.7	4.208	4.823	3.611	4.085	4.384	4.067	4.437	3.927	4.691	3.936	4.753	3.848	4.612	3.707	5.21	3.646	5.429	4.103	4.64995
aeg 55	Ae.aegypti	Nagpur	Indira gandhi medical college, Nagpur	NG_05	21°09'13.0"N	79°05'37.3"E	4.815	2.513	6.66	2.793	6.809	2.916	6.897	3.145	6.879	3.303	6.651	3.47	6.264	3.611	5.807	3.707	5.21	3.804	4.305	3.83	3.821	3.18	4.542	3.215	4.595	3.066	4.85	3.11	4.929	3.022	4.823	2.908	5.28	2.855	5.465	3.268	4.35419
aeg 56	Ae.aegypti	Nagpur	Indira gandhi medical college, Nagpur	NG_05	21°09'13.0"N	79°05'37.3"E	3.919	2.847	5.842	3.022	5.983	3.127	6.071	3.356	6.045	3.523	5.834	3.681	5.491	3.839	5.034	3.962	4.419	4.103	3.496	4.19	2.978	3.558	3.698	3.549	3.698	3.408	3.953	3.417	4.085	3.321	3.909	3.224	4.56	3.136	4.674	3.575	4.4263
aeg 57	Ae.aegypti	Nagpur	Indira gandhi medical college, Nagpur	NG_05	21°09'13.0"N	79°05'37.3"E	4.736	2.1	6.554	2.398	6.704	2.538	6.774	2.732	6.73	2.872	6.51	3.048	6.159	3.18	5.658	3.312	5.043	3.4	4.138	3.461	3.663	2.776	4.419	2.828	4.437	2.679	4.674	2.705	4.735	2.618	4.639	2.521	5.306	2.468	5.368	2.899	4.40334
aeg 58	Ae.aegypti	Nagpur	Indira gandhi medical college, Nagpur	NG_05	21°09'13.0"N	79°05'37.3"E	4.262	3.26	6.062	3.364	6.247	3.505	6.379	3.69	6.352	3.865	6.124	4.05	5.772	4.217	5.306	4.331	4.709	4.48	3.786	4.577	3.303	3.997	4.015	3.944	4.024	3.839	4.296	3.821	4.393	3.76	4.19	3.637	4.876	3.549	4.99	3.98	4.35839
aeg 59	Ae.aegypti	Nagpur	Indira gandhi medical college, Nagpur	NG_05	21°09'13.0"N	79°05'37.3"E	5.457	2.68	7.134	2.995	7.275	3.162	7.371	3.321	7.328	3.496	7.09	3.698	6.712	3.83	6.141	3.927	5.482	4.032	4.516	4.129	3.953	3.408	4.85	3.452	4.876	3.303	5.157	3.321	5.263	3.241	5.122	3.11	5.79	3.057	5.878	3.531	4.69083
aeg 61	Ae.aegypti	Nagpur	Narayana IAS Academy, Nagpur	NG_06	21°08'34.9"N	79°04'59.1"E	4.104	1.441	5.878	1.712	6.071	1.862	6.168	2.029	6.115	2.196	5.886	2.371	5.561	2.547	5.025	2.661	4.349	2.828	3.461	2.89	2.899	2.24	3.619	2.213	3.646	2.082	3.909	2.09	3.997	1.985	3.813	1.871	4.551	1.8	4.586	2.222	4.64983
aeg 62	Ae.aegypti	Nagpur	Narayana IAS Academy, Nagpur	NG_06	21°08'34.9"N	79°04'59.1"E	4.42	3.26	6.405	3.479	6.581	3.646	6.616	3.813	6.572	3.988	6.343	4.182	6.001	4.34	5.5	4.437	4.823	4.603	3.971	4.718	3.303	4.076	4.103	4.041	4.164	3.9	4.419	3.918	4.56	3.795	4.34	3.672	4.858	3.611	5.087	4.067	4.65785
aeg 63	Ae.aegypti	Nagpur	Nagpur Railway Station	NG_07	21°09'08.3"N	79°05'17.5"E	5.316	1.002	7.09	1.405	7.248	1.581	7.328	1.774	7.257	1.958	7.038	2.134	6.677	2.222	6.106	2.336	5.28	2.477	4.226	2.477	3.76	1.721	4.542	1.756	4.577	1.66	4.885	1.651	4.981	1.554	4.858	1.422	5.544	1.405	5.623	1.862	5.08573
aeg 64	Ae.aegypti	Nagpur	Nagpur Railway Station	NG_07	21°09'08.3"N	79°05'17.5"E	4.886	0.914	6.668	1.159	6.774	1.308	6.853	1.475	6.818	1.633	6.572	1.862	6.273	2.029	5.711	2.169	5.043	2.354	3.997	2.495	3.54	1.809	4.313	1.765	4.322	1.607	4.551	1.607	4.603	1.493	4.533	1.405	5.412	1.273	5.333	1.748	4.78938
aeg 65	Ae.aegypti	Nagpur	Nagpur Railway Station	NG_07	21°09'08.3"N	79°05'17.5"E	5.264	3.629	6.95	3.865	7.196	4.032	7.205	4.226	7.169	4.445	6.967	4.586	6.598	4.797	6.027	4.946	5.324	5.139	4.252	5.254	3.654	4.533	4.489	4.489	4.498	4.322	4.779	4.313	4.823	4.234	4.656	4.076	5.368	4.041	5.579	4.48	5.10278
aeg 66	Ae.aegypti	Nagpur	Nagpur Railway Station	NG_07	21°09'08.3"N	79°05'17.5"E	5.009	3.207	6.976	3.637	7.143	3.795	7.152	3.971	7.09	4.19	6.8	4.357	6.466	4.463	5.957	4.551	5.219	4.647	4.287	4.639	3.734	3.909	4.56	4.024	4.603	3.865	4.832	3.865	4.911	3.751	4.683	3.602	5.544	3.611	5.676	4.138	4.8636
aeg 67	Ae.aegypti	Raipur	Changurabhata	RP_01	21°13'18.6"N	81°36'50.8"E	3.831	1.968	5.561	2.169	5.693	2.292	5.781	2.486	5.755	2.688	5.579	2.82	5.254	2.951	4.788	3.074	4.226	3.197	3.426	3.277	2.943	2.705	3.69	2.67	3.734	2.547	3.892	2.556	3.971	2.468	3.892	2.389	4.445	2.319	4.41	2.688	4.0028
aeg 68	Ae.aegypti	Raipur	Janta Colony-1	RP_02	21°15'47.6"N	81°37'16.8"E	4.323	1.819	6.115	2.117	6.273	2.248	6.361	2.477	6.352	2.618	6.176	2.793	5.79	2.925	5.263	3.074	4.612	3.171	3.663	3.259	3.241	2.6	3.962	2.574	3.962	2.451	4.182	2.459	4.217	2.38	4.085	2.275	4.779	2.213	4.735	2.591	4.5527
aeg 69	Ae.aegypti	Raipur	R.V.H. Colony	RP_03	21°15'48.9"N	81°38'25.9"E	5.29	2.522	6.844	2.741	7.082	2.908	7.187	3.136	7.169	3.321	6.967	3.558	6.537	3.751	5.966	3.918	5.298	4.094	4.243	4.226	3.716	3.479	4.568	3.408	4.577	3.277	4.902	3.25	4.981	3.145	4.823	3.031	5.5	2.934	5.579	3.435	4.92674
aeg 70	Ae.aegypti	Raipur	Moudhapara	RP_04	21°14'51.0"N	81°38'13.5"E	4.464	1.924	6.449	2.161	6.651	2.31	6.721	2.53	6.73	2.679	6.484	2.864	6.124	3.057	5.64	3.197	4.973	3.312	3.874	3.426	3.531	2.688	4.278	2.705	4.278	2.503	4.542	2.547	4.603	2.415	4.516	2.284	5.183	2.266	5.236	2.697	4.6807
aeg 71	Ae.aegypti	Raipur	Moudhapara	RP_04	21°14'51.0"N	81°38'13.5"E	5.272	0.958	7.055	1.238	7.231	1.414	7.292	1.607	7.24	1.783	7.082	1.941	6.712	2.117	6.115	2.248	5.473	2.38	4.524	2.433	4.067	1.73	4.814	1.712	4.867	1.554	5.087	1.598	5.183	1.493	5.087	1.37	5.719	1.343	5.79	1.783	4.63358
aeg 72	Ae.aegypti	Raipur	Sai Ssimran city	RP_05	21°12'08.2"N	81°38'13.5"E	3.894	1.342	5.457	1.472	5.621	1.596	5.713	1.792	5.699	1.936	5.477	2.074	5.182	2.237	4.77	2.362	4.168	2.499	3.258	2.427	2.905	2.002	3.579	2.015	3.618	1.864	3.769	1.891	3.802	1.786	3.73	1.675	4.423	1.635	4.449	1.995	4.00216
aeg 73	Ae.aegypti	Raipur	Birgoan	RP_06	21°17'36.3"N	81°36'59.1"E	3.279	1.721	5.137	1.956	5.274	2.107	5.372	2.362	5.326	2.532	5.097	2.696	4.731	2.846	4.188	2.964	3.605	3.075	2.813	3.154	2.336	2.466	2.997	2.473	3.01	2.342	3.252	2.329	3.265	2.224	3.016	2.08	3.756	2.054	3.867	2.512	4.45048
aeg 74	Ae.aegypti	Raipur	Birgoan	RP_06	21°17'36.3"N	81°36'59.1"E	3.449	1.702	5.163	1.982	5.287	2.126	5.379	2.336	5.313	2.525	5.117	2.696	4.744	2.853	4.247	2.983	3.625	3.082	2.676	3.141	2.257	2.447	2.957	2.46	2.97	2.336	3.239	2.349	3.265	2.237	3.154	2.107	3.743	2.061	3.874	2.512	4.50465
aeg 75	Ae.aegypti	Raipur	Bhanpuri-2	RP_07	21°17'39.0"N	81°38'39.5"E	2.88	1.846	4.607	1.995	4.731	2.087	4.809	2.211	4.816	2.342	4.626	2.453	4.292	2.597	3.906	2.696	3.298	2.807	2.48	2.872	2.362	2.414	2.97	2.394	2.99	2.29	3.147	2.29	3.193	2.218	3.154	2.12	3.651	2.087	3.671	2.388	3.58624
aeg 76	Ae.aegypti	Raipur	Urkura	RP_08	21°18'23.2"N	81°39'07.8"E	3.639	1.754	5.366	1.917	5.549	2.035	5.641	2.237	5.627	2.414	5.444	2.565	5.097	2.748	4.607	2.872	3.985	3.016	3.121	3.114	2.617	2.486	3.337	2.48	3.37	2.322	3.559	2.362	3.625	2.231	3.5	2.159	4.05	2.074	4.22	2.486	4.33472
aeg 77	Ae.aegypti	Raipur	Urkura	RP_08	21°18'23.2"N	81°39'07.8"E	3.704	1.8	5.182	2.021	5.359	2.146	5.405	2.355	5.411	2.519	5.176	2.696	4.868	2.833	4.364	2.951	3.795	3.075	2.99	3.173	2.401	2.499	3.173	2.532	3.186	2.414	3.376	2.388	3.415	2.322	3.337	2.192	3.906	2.12	4.05	2.558	4.23497
aeg 79	Ae.aegypti	Raipur	Mowa	RP_09	21°17'18.9"N	81°40'12.1"E	3.606	1.113	5.385	1.387	5.562	1.55	5.608	1.727	5.575	1.891	5.385	2.061	4.999	2.237	4.469	2.342	3.802	2.493	3.069	2.597	2.336	1.936	2.997	1.871	3.154	1.76	3.304	1.76	3.422	1.668	3.33	1.524	4.018	1.465	4.05	1.917	4.66183
aeg 80	Ae.aegypti	Raipur	Mowa	RP_09	21°17'18.9"N	81°40'12.1"E	3.619	1.558	5.451	2.035	5.621	2.185	5.654	2.394	5.575	2.532	5.392	2.682	4.999	2.82	4.535	2.905	3.749	2.97	2.997	3.036	2.355	2.29	3.088	2.329	3.121	2.159	3.435	2.205	3.507	2.093	3.37	1.976	4.018	1.963	4.076	2.44	4.69048
aeg 81	Ae.aegypti	Vishakhapattnam	Dwarka Nagar	VP_01	17°43'34.4"N	83°18'35.2"E	3.069	0.746	4.535	0.935	4.672	1.066	4.744	1.223	4.705	1.406	4.508	1.596	4.188	1.766	3.73	1.897	3.232	1.995	2.388	2.107	1.891	1.459	2.584	1.465	2.63	1.328	2.853	1.354	2.931	1.236	2.833	1.105	3.337	1.086	3.357	1.452	4.01914
aeg 82	Ae.aegypti	Vishakhapattnam	Dwarka Nagar	VP_01	17°43'34.4"N	83°18'35.2"E	3.41	1.865	4.966	2.133	5.091	2.237	5.189	2.427	5.156	2.578	4.934	2.748	4.633	2.866	4.103	2.931	3.533	3.016	2.859	3.029	2.322	2.453	2.97	2.453	2.99	2.322	3.193	2.368	3.265	2.309	3.186	2.205	3.874	2.185	3.867	2.571	4.03678
aeg 83	Ae.aegypti	Vishakhapattnam	Dwarka Nagar	VP_01	17°43'34.4"N	83°18'35.2"E	3.711	1.741	5.483	2.061	5.641	2.218	5.713	2.421	5.654	2.571	5.451	2.722	5.117	2.846	4.633	2.938	3.998	3.042	3.101	3.082	2.584	2.414	3.121	2.394	3.036	2.27	3.572	2.303	3.618	2.224	3.494	2.107	4.135	2.074	4.227	2.493	4.5671
aeg 84	Ae.aegypti	Vishakhapattnam	H B Colony	VP_02	17°44'44.9"N	83°19'37.8"E	3.809	2.389	5.339	2.669	5.49	2.807	5.562	2.997	5.516	3.154	5.32	3.337	4.999	3.468	4.574	3.586	3.985	3.677	3.285	3.697	2.813	3.075	3.487	3.075	3.52	2.931	3.723	2.977	3.762	2.879	3.631	2.754	4.292	2.741	4.292	3.147	3.91583
aeg 85	Ae.aegypti	Vishakhapattnam	Akkayyapalem	VP_03	17°44'05.1"N	83°17'57.7"E	3.305	1.512	4.711	1.688	4.875	1.799	4.986	1.989	4.973	2.159	4.809	2.303	4.495	2.46	4.018	2.591	3.468	2.676	2.637	2.748	2.29	2.224	2.905	2.218	2.905	2.087	3.134	2.093	3.213	2.015	3.075	1.917	3.658	1.832	3.756	2.224	3.88293
aeg 86	Ae.aegypti	Vishakhapattnam	Kailaspuram	VP_04	17°44'34.8"N	83°17'51.0"E	3.207	1.839	4.894	2.015	5.038	2.126	5.13	2.296	5.091	2.466	4.822	2.65	4.535	2.761	4.07	2.866	3.52	2.97	2.787	3.069	2.329	2.532	2.983	2.473	2.977	2.362	3.219	2.368	3.285	2.29	3.213	2.179	3.723	2.126	3.756	2.48	3.95215
aeg 87	Ae.aegypti	Vishakhapattnam	Kailaspuram	VP_04	17°44'34.8"N	83°17'51.0"E	3.01	1.42	4.652	1.629	4.842	1.753	4.894	1.949	4.894	2.1	4.62	2.25	4.26	2.368	3.821	2.46	3.265	2.545	2.525	2.617	2.021	2.035	2.709	2.035	2.722	1.904	2.983	1.93	3.042	1.851	2.983	1.747	3.409	1.714	3.553	2.08	4.01326
aeg 88	Ae.aegypti	Vishakhapattnam	Seethammadara	VP_05	17°44'42.2"N	83°18'48.2"E	3.331	1.387	5.209	1.655	5.346	1.786	5.392	1.943	5.333	2.107	5.15	2.25	4.842	2.421	4.391	2.545	3.736	2.663	2.944	2.715	2.493	2.074	3.167	2.087	3.186	1.949	3.363	1.976	3.442	1.858	3.304	1.753	4.214	1.74	4.057	2.126	4.21924
aeg 89	Ae.aegypti	Vishakhapattnam	Seethammadara	VP_05	17°44'42.2"N	83°18'48.2"E	3.364	1.963	5.156	2.211	5.307	2.349	5.366	2.525	5.366	2.676	5.137	2.82	4.842	2.983	4.371	3.095	3.73	3.206	2.925	3.239	2.381	2.61	3.141	2.624	3.167	2.499	3.337	2.512	3.389	2.421	3.311	2.303	3.88	2.27	4.076	2.715	4.24402
aeg 90	Ae.aegypti	Vishakhapattnam	Prashanti Nagar	VP_06	17°43'58.4"N	83°19'42.9"E	3.423	1.191	4.94	1.524	5.104	1.668	5.169	1.897	5.091	2.035	4.875	2.218	4.502	2.309	4.05	2.427	3.429	2.466	2.617	2.46	2.198	1.825	2.846	1.832	2.885	1.714	3.16	1.753	3.199	1.675	3.173	1.544	3.644	1.544	3.716	1.956	4.2072
aeg 91	Ae.aegypti	Vishakhapattnam	Prashanti Nagar	VP_06	17°43'58.4"N	83°19'42.9"E	3.652	1.767	5.359	1.91	5.503	2.074	5.582	2.296	5.575	2.447	5.346	2.624	4.98	2.774	4.535	2.905	3.959	3.023	3.062	3.088	2.617	2.48	3.278	2.466	3.317	2.329	3.566	2.362	3.625	2.25	3.546	2.146	4.083	2.074	4.155	2.486	4.25666
aeg 92	Ae.aegypti	Vishakhapattnam	Pedda Waltair	VP_07	17°43'57.1"N	83°20'21.5"E	3.135	1.728	4.816	2.002	4.934	2.165	4.973	2.342	4.921	2.466	4.724	2.617	4.371	2.754	3.932	2.859	3.376	2.97	2.578	3.042	2.185	2.421	2.741	2.388	2.807	2.277	3.049	2.316	3.121	2.211	3.029	2.087	3.612	2.067	3.631	2.447	4.04814
aeg 93	Ae.aegypti	Vishakhapattnam	Adarsh Nagar	VP_08	17°45'48.4"N	83°20'01.8"E	3.253	1.08	4.921	1.269	5.071	1.4	5.143	1.583	5.156	1.714	4.98	1.877	4.685	2.061	4.227	2.218	3.638	2.349	2.833	2.434	2.159	1.838	2.951	1.819	2.983	1.714	3.18	1.688	3.278	1.603	3.173	1.459	3.651	1.387	3.788	1.799	4.18422
aeg 94	Ae.aegypti	Vishakhapattnam	Midhilapuri Colony	VP_09	17°48'14.1"N	83°21'39.1"E	2.984	2.12	4.515	2.309	4.724	2.473	4.803	2.643	4.737	2.781	4.535	2.957	4.175	3.088	3.736	3.18	3.173	3.291	2.309	3.343	1.943	2.774	2.682	2.768	2.682	2.643	2.892	2.663	2.97	2.597	2.807	2.453	3.468	2.434	3.514	2.794	3.98954
aeg 95	Ae.aegypti	Vishakhapattnam	H B Colony	VP_02	17°44'44.9"N	83°19'37.8"E	5.598	2.232	7.275	2.574	7.398	2.723	7.468	2.899	7.451	3.083	7.248	3.268	6.897	3.435	6.396	3.558	5.737	3.654	4.885	3.734	4.428	3.057	5.122	3.031	5.131	2.908	5.438	2.925	5.535	2.793	5.429	2.661	6.036	2.644	6.097	3.092	4.3902
aeg 96	Ae.aegypti	Vishakhapattnam	Madhurawada	VP_10	17°48'53.4"N	83°22'05.4"E	4.35	1.863	5.737	2.178	5.869	2.301	5.895	2.468	5.86	2.591	5.684	2.688	5.412	2.811	5.043	2.899	4.507	2.995	3.769	3.031	3.461	2.512	4.024	2.495	4.05	2.389	4.234	2.407	4.313	2.292	4.217	2.205	4.7	2.187	4.832	2.547	3.52022
aeg 97	Ae.aegypti	Vishakhapattnam	Madhurawada	VP_10	17°48'53.4"N	83°22'05.4"E	3.884	1.784	5.368	2.117	5.517	2.266	5.544	2.424	5.473	2.556	5.333	2.679	5.06	2.793	4.647	2.864	4.147	2.96	3.479	3.004	3.145	2.495	3.707	2.468	3.725	2.336	3.9	2.363	3.944	2.275	3.804	2.161	4.48	2.143	4.454	2.512	3.5011
aeg 98	Ae.aegypti	Vishakhapattnam	Srinivasa Nagar	VP_11	17°49'13.9"N	83°21'39.4"E	5.272	1.757	6.765	2.152	6.923	2.31	6.967	2.512	6.923	2.697	6.686	2.864	6.299	3.031	5.816	3.145	5.157	3.206	4.138	3.233	3.795	2.538	4.524	2.53	4.568	2.371	4.806	2.424	4.893	2.301	4.806	2.161	5.412	2.169	5.465	2.635	4.57164
aeg 99	Ae.aegypti	Vishakhapattnam	Srinivasa Nagar	VP_11	17°49'13.9"N	83°21'39.4"E	5.343	1.722	6.853	2.002	7.002	2.143	7.046	2.336	7.002	2.512	6.8	2.644	6.449	2.793	6.053	2.855	5.421	2.89	4.735	2.89	4.322	2.284	5.016	2.363	5.034	2.24	5.289	2.275	5.35	2.187	5.298	2.055	5.746	2.055	5.825	2.459	3.81541
aeg 100	Ae.aegypti	Vishakhapattnam	Carpenters colony	VP_12	17°49'32.3"N	83°21'29.3"E	4.402	2.707	6.44	2.864	6.598	3.004	6.677	3.197	6.668	3.364	6.44	3.558	6.018	3.698	5.605	3.813	4.955	3.971	4.094	4.059	3.584	3.426	4.34	3.408	4.357	3.285	4.595	3.294	4.665	3.206	4.551	3.048	5.016	2.995	5.192	3.417	4.42579
aeg 101	Ae.aegypti	Srinagar	Jamia Chowk - 1	SN_1	34°01'56.2"N	74°49'19.7"E	2.715	1.938	3.448	2.02	3.487	2.082	3.509	2.139	3.505	2.209	3.413	2.279	3.281	2.345	3.066	2.389	2.793	2.442	2.429	2.455	2.27	2.244	2.538	2.218	2.538	2.156	2.618	2.165	2.639	2.121	2.609	2.082	2.89	2.06	2.969	2.222	1.82139
aeg 102	Ae.aegypti	Srinagar	Jamia Chowk - 1	SN_1	34°01'56.2"N	74°49'19.7"E	2.008	1.784	2.811	1.897	2.916	1.976	2.947	2.055	2.921	2.152	2.815	2.222	2.653	2.279	2.424	2.323	2.108	2.354	1.726	2.358	1.519	2.064	1.844	2.073	1.853	2.011	1.989	2.024	2.011	1.98	1.941	1.937	2.288	1.928	2.328	2.134	2.02419
aeg 103	Ae.aegypti	Srinagar	Jamia Chowk - 1	SN_1	34°01'56.2"N	74°49'19.7"E	2.228	1.068	2.908	1.198	2.965	1.26	3.013	1.343	2.991	1.405	2.894	1.466	2.745	1.524	2.556	1.576	2.275	1.616	1.919	1.611	1.717	1.335	1.998	1.37	2.002	1.313	2.103	1.313	2.13	1.273	2.082	1.212	2.393	1.22	2.363	1.379	1.84602
aeg 104	Ae.aegypti	Srinagar	Jamia Chowk - 1	SN_1	34°01'56.2"N	74°49'19.7"E	2.091	1.388	2.806	1.502	2.894	1.567	2.934	1.651	2.916	1.734	2.82	1.809	2.657	1.871	2.459	1.919	2.165	1.954	1.77	1.937	1.607	1.686	1.941	1.699	1.967	1.629	2.055	1.647	2.077	1.598	2.007	1.559	2.284	1.554	2.345	1.721	1.86853
aeg 105	Ae.aegypti	Srinagar	Jamia Chowk - 1	SN_1	34°01'56.2"N	74°49'19.7"E	2.342	0.378	3.14	0.5	3.233	0.579	3.263	0.68	3.237	0.746	3.158	0.807	2.956	0.873	2.727	0.922	2.446	0.957	2.06	0.961	1.862	0.671	2.196	0.68	2.209	0.614	2.297	0.623	2.301	0.583	2.253	0.539	2.503	0.531	2.591	0.715	2.00274
aeg 106	Ae.aegypti	Srinagar	Jamia Chowk - 1	SN_1	34°01'56.2"N	74°49'19.7"E	2.175	1.489	2.987	1.598	3.057	1.664	3.096	1.765	3.079	1.84	2.973	1.91	2.846	1.98	2.613	2.038	2.288	2.095	1.932	2.13	1.642	1.818	1.989	1.831	1.994	1.748	2.112	1.765	2.147	1.721	2.125	1.66	2.389	1.638	2.429	1.844	2.04874
aeg 107	Ae.aegypti	Srinagar	Jamia Chowk - 1	SN_1	34°01'56.2"N	74°49'19.7"E	1.815	0.953	2.626	1.036	2.723	1.111	2.763	1.198	2.736	1.282	2.618	1.352	2.464	1.414	2.24	1.453	1.963	1.51	1.559	1.545	1.321	1.264	1.668	1.255	1.668	1.207	1.783	1.212	1.818	1.154	1.761	1.119	2.082	1.097	2.156	1.286	2.01122
aeg 110	Ae.aegypti	Srinagar	Jamia Chowk - 1	SN_1	34°01'56.2"N	74°49'19.7"E	2.017	1.287	2.758	1.405	2.802	1.44	2.842	1.55	2.846	1.62	2.749	1.704	2.591	1.77	2.385	1.818	2.108	1.849	1.712	1.866	1.515	1.598	1.866	1.611	1.879	1.55	1.972	1.563	1.985	1.515	1.919	1.466	2.2	1.44	2.222	1.616	1.88125
aeg 111	Ae.aegypti	Srinagar	Jamia Chowk - 1	SN_1	34°01'56.2"N	74°49'19.7"E	2.175	1.463	2.938	1.589	3.009	1.66	3.039	1.748	3.022	1.831	2.89	1.906	2.749	1.958	2.547	1.998	2.266	2.051	1.857	2.06	1.695	1.77	2.007	1.787	2.002	1.726	2.152	1.734	2.196	1.699	2.161	1.651	2.437	1.625	2.437	1.813	1.90334
aeg 112	Ae.aegypti	Srinagar	Jamia Chowk - 1	SN_1	34°01'56.2"N	74°49'19.7"E	1.885	1.643	2.697	1.721	2.767	1.787	2.793	1.849	2.78	1.91	2.661	1.985	2.538	2.073	2.367	2.134	2.068	2.2	1.69	2.244	1.458	1.98	1.809	1.972	1.809	1.893	1.919	1.91	1.941	1.862	1.879	1.822	2.183	1.787	2.248	1.972	1.8788
aeg 113	Ae.aegypti	Srinagar	Jamia Chowk - 1	SN_1	34°01'56.2"N	74°49'19.7"E	1.815	1.463	2.745	1.611	2.828	1.673	2.864	1.778	2.837	1.857	2.727	1.937	2.574	2.002	2.341	2.068	2.033	2.125	1.537	2.143	1.396	1.84	1.743	1.831	1.743	1.761	1.862	1.778	1.879	1.73	1.831	1.66	2.165	1.647	2.187	1.853	2.13746
aeg 114	Ae.aegypti	Srinagar	Jamia Chowk - 1	SN_1	34°01'56.2"N	74°49'19.7"E	1.823	1.107	2.609	1.132	2.692	1.194	2.749	1.269	2.736	1.357	2.653	1.444	2.512	1.524	2.279	1.603	1.989	1.699	1.638	1.752	1.374	1.471	1.726	1.458	1.743	1.37	1.822	1.383	1.857	1.326	1.822	1.264	2.103	1.242	2.152	1.436	1.94743
aeg 116	Ae.aegypti	Srinagar	Jamia Chowk - 2	SN_2	34°01'56.2"N	74°49'19.7"E	2.43	1.024	3.272	1.137	3.351	1.207	3.386	1.277	3.36	1.365	3.255	1.44	3.074	1.506	2.833	1.545	2.556	1.594	2.165	1.616	1.919	1.304	2.275	1.317	2.297	1.26	2.42	1.269	2.446	1.229	2.407	1.176	2.71	1.163	2.723	1.365	2.0354
aeg 117	Ae.aegypti	Srinagar	Jamia Chowk - 2	SN_2	34°01'56.2"N	74°49'19.7"E	2.544	1.274	3.268	1.405	3.303	1.458	3.325	1.519	3.325	1.589	3.224	1.664	3.105	1.721	2.864	1.761	2.613	1.787	2.275	1.796	2.082	1.554	2.393	1.559	2.398	1.502	2.508	1.506	2.525	1.466	2.495	1.422	2.771	1.418	2.811	1.598	1.76477
aeg 118	Ae.aegypti	Srinagar	Jamia Chowk - 2	SN_2	34°01'56.2"N	74°49'19.7"E	1.88	1.208	2.604	1.282	2.661	1.339	2.727	1.409	2.71	1.493	2.618	1.567	2.468	1.638	2.27	1.673	1.972	1.717	1.62	1.717	1.502	1.48	1.778	1.484	1.778	1.44	1.919	1.449	1.937	1.405	1.906	1.365	2.161	1.348	2.187	1.528	1.74678
aeg 119	Ae.aegypti	Guwahati	Bishnu Rabha Nagar	GW_01	26°10'02.9"N	91°44'48.2"E	3.783	1.531	5.392	1.792	5.483	1.91	5.595	2.107	5.569	2.296	5.372	2.486	5.019	2.656	4.567	2.768	3.874	2.911	3.01	3.023	2.427	2.316	3.147	2.29	3.18	2.165	3.429	2.165	3.494	2.061	3.402	1.956	4.103	1.91	4.161	2.322	4.51954
aeg 120	Ae.aegypti	Guwahati	Bishnu Rabha Nagar	GW_01	26°10'02.9"N	91°44'48.2"E	3.305	1.682	5.241	1.904	5.372	2.021	5.464	2.25	5.431	2.434	5.241	2.617	4.901	2.787	4.423	2.925	3.756	3.055	2.892	3.147	2.277	2.46	3.088	2.427	3.101	2.29	3.317	2.283	3.376	2.198	3.298	2.087	3.906	2.048	4.109	2.486	4.53507
aeg 121	Ae.aegypti	Guwahati	Bishnu Rabha Nagar	GW_01	26°10'02.9"N	91°44'48.2"E	3.822	1.139	5.549	1.334	5.654	1.432	5.713	1.583	5.673	1.72	5.49	1.897	5.196	2.061	4.744	2.198	4.135	2.316	3.167	2.362	2.754	1.812	3.514	1.812	3.52	1.681	3.743	1.701	3.788	1.616	3.684	1.485	4.325	1.432	4.443	1.845	4.19469
aeg 122	Ae.aegypti	Guwahati	Bishnu Rabha Nagar	GW_01	26°10'02.9"N	91°44'48.2"E	3.495	1.001	5.353	1.236	5.569	1.38	5.66	1.596	5.588	1.779	5.405	1.956	5.058	2.126	4.541	2.244	3.834	2.362	2.99	2.46	2.388	1.733	3.239	1.753	3.258	1.622	3.474	1.629	3.52	1.504	3.468	1.38	3.965	1.354	4.207	1.792	4.58015
aeg 123	Ae.aegypti	Guwahati	Bishnu Rabha Nagar	GW_01	26°10'02.9"N	91°44'48.2"E	3.482	2.435	5.104	2.735	5.169	2.853	5.241	2.997	5.202	3.154	4.993	3.317	4.692	3.429	4.194	3.527	3.592	3.618	2.637	3.599	2.296	3.016	3.029	3.075	3.082	2.964	3.265	2.97	3.311	2.885	3.16	2.761	3.867	2.768	3.939	3.154	4.17532
aeg 124	Ae.aegypti	Guwahati	Bishnu Rabha Nagar	GW_01	26°10'02.9"N	91°44'48.2"E	3.632	1.859	5.32	2.179	5.49	2.375	5.503	2.48	5.464	2.578	5.254	2.735	4.96	2.839	4.548	2.938	3.959	3.055	3.193	3.114	2.826	2.538	3.415	2.532	3.487	2.401	3.658	2.408	3.71	2.316	3.631	2.211	4.266	2.185	4.325	2.578	3.88188
aeg 125	Ae.aegypti	Guwahati	Bishnu Rabha Nagar	GW_01	26°10'02.9"N	91°44'48.2"E	3.455	1.204	5.15	1.511	5.294	1.675	5.32	1.819	5.268	1.943	5.045	2.08	4.809	2.185	4.397	2.277	3.802	2.408	2.997	2.447	2.63	1.864	3.324	1.891	3.317	1.733	3.494	1.753	3.533	1.668	3.442	1.537	4.181	1.537	4.161	1.923	3.86499
aeg 126	Ae.aegypti	Guwahati	Bishnu Rabha Nagar	GW_01	26°10'02.9"N	91°44'48.2"E	2.997	2.029	5.045	2.349	5.176	2.486	5.235	2.689	5.182	2.866	4.986	3.029	4.665	3.186	4.148	3.285	3.461	3.396	2.565	3.448	1.93	2.715	2.833	2.761	2.853	2.617	3.101	2.63	3.141	2.538	2.977	2.388	3.802	2.381	3.841	2.839	4.63368
aeg 127	Ae.aegypti	Guwahati	Barthakur Mill road	GW_02	26°10'08.0"N	91°45'37.5"E	3.586	1.99	5.228	2.264	5.346	2.401	5.405	2.578	5.379	2.728	5.202	2.866	4.849	2.997	4.43	3.095	3.874	3.141	3.049	3.16	2.643	2.558	3.357	2.578	3.363	2.506	3.514	2.512	3.579	2.44	3.442	2.316	4.181	2.316	4.116	2.676	3.94168
aeg 128	Ae.aegypti	Guwahati	Barthakur Mill road	GW_02	26°10'08.0"N	91°45'37.5"E	3.527	1.171	5.411	1.282	5.601	1.406	5.699	1.629	5.699	1.805	5.477	2.008	5.163	2.179	4.665	2.316	4.031	2.493	3.154	2.61	2.584	1.963	3.37	1.91	3.402	1.76	3.586	1.786	3.664	1.661	3.553	1.544	4.129	1.465	4.266	1.904	4.45754
aeg 129	Ae.aegypti	Guwahati	Barthakur Mill road	GW_02	26°10'08.0"N	91°45'37.5"E	3.652	1.263	5.294	1.446	5.431	1.589	5.536	1.773	5.503	1.91	5.274	2.074	4.947	2.231	4.508	2.322	3.998	2.46	3.141	2.466	2.748	1.897	3.442	1.923	3.455	1.805	3.625	1.819	3.664	1.727	3.533	1.629	4.161	1.589	4.181	1.949	3.95503
aeg 130	Ae.aegypti	Guwahati	Maligaon-1	GW_03	26°09'53.8"N	91°41'30.7"E	3.593	1.885	5.038	2.179	5.182	2.355	5.254	2.519	5.215	2.676	5.032	2.8	4.698	2.944	4.22	3.055	3.677	3.147	2.872	3.141	2.48	2.552	3.154	2.571	3.173	2.434	3.343	2.466	3.442	2.388	3.396	2.29	3.841	2.244	3.874	2.643	3.94112
aeg 131	Ae.aegypti	Guwahati	Maligaon-1	GW_03	26°09'53.8"N	91°41'30.7"E	3.586	1.898	5.346	2.061	5.457	2.179	5.542	2.336	5.523	2.473	5.313	2.669	4.973	2.833	4.515	2.944	4.024	3.075	3.219	3.141	2.879	2.565	3.507	2.571	3.507	2.427	3.677	2.427	3.716	2.349	3.592	2.237	4.364	2.192	4.377	2.571	3.90377
aeg 132	Ae.aegypti	Guwahati	Maligaon-1	GW_03	26°09'53.8"N	91°41'30.7"E	3.403	1.329	5.182	1.681	5.274	1.805	5.326	1.989	5.307	2.12	5.091	2.264	4.796	2.401	4.319	2.499	3.782	2.584	2.931	2.604	2.532	1.982	3.18	2.008	3.271	1.858	3.435	1.891	3.461	1.819	3.376	1.727	3.946	1.668	3.972	2.067	4.04244
aeg 133	Ae.aegypti	Guwahati	Maligaon-1	GW_03	26°09'53.8"N	91°41'30.7"E	3.789	0.805	5.261	1.027	5.425	1.171	5.503	1.354	5.431	1.485	5.274	1.629	4.96	1.805	4.515	1.897	3.959	2.008	3.108	2.061	2.597	1.459	3.389	1.459	3.389	1.341	3.612	1.36	3.631	1.262	3.54	1.158	4.089	1.125	4.188	1.511	4.00821
aeg 134	Ae.aegypti	Guwahati	Maligaon-2	GW_04	26°09'49.8"N	91°41'24.0"E	3.691	1.368	5.405	1.504	5.503	1.603	5.595	1.825	5.569	2.041	5.366	2.211	5.032	2.408	4.535	2.578	3.854	2.754	2.879	2.872	2.486	2.218	3.213	2.172	3.278	2.035	3.442	2.035	3.481	1.91	3.298	1.792	4.129	1.707	4.22	2.165	4.55878
aeg 135	Ae.aegypti	Guwahati	Rehabari	GW_05	26°10'23.8"N	91°44'54.7"E	5.211	1.854	6.853	2.275	7.02	2.424	7.046	2.626	6.976	2.82	6.756	3.013	6.379	3.162	5.799	3.312	4.99	3.452	3.962	3.523	3.4	2.776	4.278	2.723	4.322	2.582	4.612	2.6	4.709	2.512	4.551	2.336	5.192	2.284	5.429	2.793	5.16966
aeg 136	Ae.aegypti	Guwahati	Rehabari	GW_05	26°10'23.8"N	91°44'54.7"E	5.141	1.652	6.765	2.064	6.932	2.222	7.011	2.442	6.976	2.653	6.712	2.82	6.282	2.969	5.772	3.083	4.955	3.224	3.892	3.321	3.312	2.495	4.234	2.53	4.261	2.345	4.586	2.389	4.762	2.284	4.595	2.117	5.201	2.055	5.359	2.582	5.15132
aeg 137	Ae.aegypti	Guwahati	Barthakur Mill road	GW_02	26°10'08.0"N	91°45'37.5"E	4.033	2.267	5.939	2.398	6.115	2.556	6.203	2.732	6.15	2.934	5.913	3.11	5.596	3.25	5.087	3.382	4.445	3.514	3.54	3.654	3.004	3.031	3.839	2.987	3.813	2.846	4.032	2.82	4.155	2.732	4.024	2.644	4.735	2.574	4.762	2.96	4.48714
aeg 138	Ae.aegypti	Guwahati	Barthakur Mill road	GW_02	26°10'08.0"N	91°45'37.5"E	4.666	2.355	6.326	2.618	6.458	2.767	6.537	3.004	6.51	3.189	6.326	3.356	5.957	3.496	5.465	3.611	4.797	3.698	3.795	3.734	3.426	3.083	4.182	3.101	4.217	2.987	4.437	2.978	4.489	2.855	4.322	2.758	4.946	2.723	5.104	3.171	4.48602
aeg 139	Ae.aegypti	Guwahati	Barthakur Mill road	GW_02	26°10'08.0"N	91°45'37.5"E	4.71	2.777	6.545	3.039	6.774	3.206	6.853	3.391	6.818	3.611	6.563	3.795	6.168	3.936	5.632	4.059	4.955	4.199	3.944	4.296	3.426	3.593	4.331	3.611	4.366	3.444	4.551	3.47	4.586	3.338	4.472	3.189	5.166	3.171	5.5	3.654	4.81091
aeg 140	Ae.aegypti	Guwahati	Barthakur Mill road	GW_02	26°10'08.0"N	91°45'37.5"E	4.561	1.872	6.027	2.196	6.176	2.319	6.22	2.495	6.212	2.705	5.966	2.846	5.535	2.987	5.069	3.074	4.445	3.145	3.496	3.215	3.048	2.538	3.848	2.574	3.857	2.424	4.059	2.433	4.138	2.345	4.05	2.24	4.797	2.205	4.797	2.644	4.47025
aeg 141	Ae.aegypti	Guwahati	Barthakur Mill road	GW_02	26°10'08.0"N	91°45'37.5"E	4.745	1.186	6.396	1.537	6.537	1.642	6.581	1.871	6.51	2.038	6.264	2.178	5.922	2.31	5.394	2.442	4.788	2.53	3.795	2.53	3.382	1.906	4.19	1.906	4.182	1.765	4.428	1.8	4.48	1.704	4.331	1.572	5.025	1.554	5.087	1.985	4.51446
aeg 142	Ae.aegypti	Guwahati	Barthakur Mill road	GW_02	26°10'08.0"N	91°45'37.5"E	4.438	2.162	6.361	2.398	6.545	2.53	6.642	2.741	6.607	2.96	6.361	3.136	5.948	3.277	5.394	3.373	4.744	3.523	3.813	3.646	3.154	2.969	4.067	2.951	4.129	2.837	4.366	2.793	4.419	2.705	4.357	2.556	4.955	2.512	5.192	2.995	4.79436
aeg 143	Ae.aegypti	Sri Ganganagar	Sri Ganganagar railway station	SG_01	29°55'55.5"N	73°52'22.1"E	3.58	0.38	5.339	0.569	5.49	0.699	5.582	0.909	5.562	1.072	5.326	1.269	5.006	1.439	4.476	1.603	3.834	1.733	2.826	1.792	2.44	1.144	3.147	1.138	3.226	0.987	3.402	0.987	3.442	0.889	3.383	0.785	4.024	0.699	4.116	1.171	4.54826
aeg 144	Ae.aegypti	Sri Ganganagar	Balluram Govt. Girls College	SG_02	29°55'32.3"N	73°52'04.5"E	3.599	1.204	5.268	1.308	5.49	1.446	5.614	1.661	5.601	1.819	5.385	1.963	5.078	2.107	4.607	2.244	4.116	2.355	3.219	2.414	2.794	1.845	3.396	1.819	3.442	1.72	3.658	1.72	3.69	1.635	3.599	1.524	4.116	1.478	4.24	1.858	4.05348
aeg 145	Ae.aegypti	Sri Ganganagar	Balluram Govt. Girls College	SG_02	29°55'32.3"N	73°52'04.5"E	3.514	1.577	5.222	1.766	5.379	1.884	5.49	2.074	5.464	2.244	5.268	2.381	4.921	2.525	4.508	2.63	3.932	2.741	2.99	2.768	2.682	2.218	3.245	2.211	3.285	2.113	3.5	2.113	3.54	2.008	3.487	1.91	4.057	1.851	4.135	2.244	4.0992
aeg 146	Ae.aegypti	Sri Ganganagar	Swami dayanand Marg	SG_03	29°55'28.6"N	73°52'19.7"E	3.573	1.263	5.248	1.537	5.438	1.707	5.536	1.897	5.49	2.061	5.268	2.244	4.881	2.375	4.312	2.453	3.743	2.565	2.663	2.578	2.277	1.93	3.042	1.963	3.101	1.825	3.33	1.851	3.409	1.76	3.285	1.642	4.083	1.603	4.037	2.048	4.58258
aeg 147	Ae.aegypti	Sri Ganganagar	Swami dayanand Marg	SG_03	29°55'28.6"N	73°52'19.7"E	3.436	1.597	5.071	1.877	5.268	2.008	5.346	2.237	5.3	2.421	5.052	2.578	4.718	2.715	4.253	2.807	3.514	2.911	2.552	2.931	2.002	2.244	2.859	2.296	2.879	2.165	3.173	2.192	3.206	2.113	3.134	1.982	3.723	1.956	3.802	2.375	4.6113
aeg 148	Ae.aegypti	Sri Ganganagar	Swami dayanand Marg	SG_03	29°55'28.6"N	73°52'19.7"E	3.416	1.021	4.98	1.216	5.124	1.354	5.189	1.537	5.143	1.694	4.953	1.851	4.652	1.995	4.175	2.087	3.566	2.244	2.722	2.342	2.192	1.74	2.911	1.694	2.951	1.563	3.147	1.57	3.199	1.485	3.082	1.367	3.644	1.308	3.854	1.72	4.23946
aeg 149	Ae.aegypti	Sri Ganganagar	Swami dayanand Marg	SG_03	29°55'28.6"N	73°52'19.7"E	3.933	0.897	5.582	1.164	5.719	1.295	5.785	1.459	5.739	1.629	5.536	1.773	5.176	1.91	4.764	1.982	4.135	2.113	3.481	2.192	2.866	1.55	3.54	1.537	3.566	1.406	3.756	1.426	3.815	1.341	3.703	1.243	4.397	1.216	4.449	1.589	4.1285
aeg 150	Ae.aegypti	Sri Ganganagar	Swami dayanand Marg	SG_03	29°55'28.6"N	73°52'19.7"E	3.743	1.126	5.425	1.426	5.608	1.563	5.686	1.779	5.647	1.976	5.405	2.139	5.052	2.257	4.508	2.349	3.9	2.434	2.898	2.427	2.381	1.76	3.167	1.805	3.226	1.668	3.54	1.688	3.559	1.616	3.383	1.459	4.214	1.485	4.116	1.904	4.61287
aeg 151	Ae.aegypti	Sri Ganganagar	Swami dayanand Marg	SG_03	29°55'28.6"N	73°52'19.7"E	3.429	0.89	5.065	1.23	5.254	1.387	5.333	1.563	5.294	1.747	5.038	1.891	4.698	2.008	4.194	2.067	3.533	2.152	2.65	2.179	2.185	1.544	2.931	1.576	2.957	1.432	3.199	1.472	3.245	1.367	3.173	1.249	3.834	1.249	3.854	1.655	4.41732
aeg 152	Ae.aegypti	Sri Ganganagar	Swami dayanand Marg	SG_03	29°55'28.6"N	73°52'19.7"E	3.599	1.073	5.268	1.282	5.451	1.446	5.569	1.589	5.536	1.812	5.353	1.976	4.953	2.139	4.43	2.27	3.795	2.394	2.807	2.44	2.349	1.786	3.127	1.805	3.193	1.661	3.383	1.688	3.435	1.583	3.376	1.459	4.063	1.406	4.148	1.877	4.53605
aeg 153	Ae.aegypti	Sri Ganganagar	Harijan Basti	SG_04	29°55'33.0"N	73°52'37.6"E	3.639	1.368	5.15	1.563	5.294	1.714	5.359	1.877	5.339	2.035	5.117	2.165	4.855	2.309	4.482	2.401	3.906	2.525	3.095	2.558	2.735	1.982	3.343	2.015	3.337	1.884	3.54	1.877	3.592	1.805	3.474	1.694	4.148	1.688	4.207	2.061	3.79816
aeg 154	Ae.aegypti	Sri Ganganagar	Harijan Basti	SG_04	29°55'33.0"N	73°52'37.6"E	3.829	1.649	5.071	1.851	5.235	2.028	5.281	2.152	5.254	2.257	5.084	2.401	4.783	2.506	4.351	2.584	3.782	2.656	3.147	2.624	2.833	2.172	3.422	2.185	3.429	2.093	3.664	2.126	3.723	2.054	3.658	1.956	4.207	1.93	4.273	2.27	3.44158
aeg 155	Ae.aegypti	Sri Ganganagar	Harijan Basti	SG_04	29°55'33.0"N	73°52'37.6"E	3.482	2.016	4.849	2.152	4.973	2.244	5.052	2.401	5.045	2.578	4.888	2.709	4.639	2.833	4.253	2.938	3.723	3.029	2.99	3.042	2.656	2.597	3.271	2.597	3.291	2.486	3.507	2.506	3.586	2.427	3.5	2.329	3.959	2.27	4.037	2.617	3.3822
aeg 156	Ae.aegypti	Sri Ganganagar	Harijan Basti	SG_04	29°55'33.0"N	73°52'37.6"E	3.488	1.656	4.875	1.884	4.98	2.035	5.006	2.165	4.993	2.303	4.796	2.401	4.535	2.525	4.168	2.597	3.631	2.663	2.839	2.637	2.617	2.159	3.199	2.198	3.199	2.1	3.389	2.113	3.422	2.035	3.376	1.93	3.985	1.904	4.057	2.303	3.45832
aeg 157	Ae.aegypti	Sri Ganganagar	Harijan Basti	SG_04	29°55'33.0"N	73°52'37.6"E	3.757	2.042	5.281	2.29	5.477	2.466	5.503	2.637	5.47	2.787	5.274	2.938	4.908	3.055	4.463	3.088	3.847	3.134	3.016	3.088	2.663	2.506	3.357	2.571	3.409	2.453	3.592	2.506	3.664	2.401	3.638	2.309	4.207	2.336	4.332	2.735	4.0028
aeg 158	Ae.aegypti	Sri Ganganagar	Harijan Basti	SG_04	29°55'33.0"N	73°52'37.6"E	3.979	1.976	5.209	2.139	5.339	2.27	5.405	2.447	5.372	2.584	5.189	2.709	4.947	2.813	4.535	2.918	4.031	2.977	3.278	2.951	3.036	2.525	3.592	2.538	3.612	2.427	3.815	2.453	3.86	2.375	3.808	2.277	4.351	2.244	4.345	2.584	3.37089
aeg 159	Ae.aegypti	Sri Ganganagar	Harijan Basti	SG_04	29°55'33.0"N	73°52'37.6"E	3.541	1.865	5.012	2.048	5.124	2.152	5.215	2.329	5.176	2.493	5.012	2.65	4.757	2.774	4.351	2.885	3.788	3.003	2.964	3.075	2.512	2.506	3.18	2.499	3.219	2.414	3.455	2.434	3.481	2.329	3.363	2.211	3.926	2.159	4.031	2.532	3.80484
aeg 161	Ae.aegypti	Sri Ganganagar	Gurunanak Basti	SG_05	29°55'37.1"N	73°52'39.7"E	3.593	1.446	5.065	1.675	5.209	1.779	5.274	1.936	5.241	2.061	5.084	2.192	4.757	2.322	4.351	2.401	3.828	2.48	3.141	2.558	2.728	2.015	3.304	2.008	3.33	1.904	3.533	1.923	3.572	1.858	3.527	1.766	4.031	1.727	4.076	2.074	3.61638
aeg 162	Ae.aegypti	Sri Ganganagar	Sri Ganganagar railway station	SG_01	29°55'55.5"N	73°52'22.1"E	5.149	1.529	6.985	1.677	7.187	1.792	7.284	1.994	7.257	2.108	7.073	2.336	6.695	2.556	6.159	2.723	5.491	2.925	4.524	3.083	4.094	2.468	4.779	2.371	4.806	2.205	5.034	2.213	5.069	2.09	4.981	1.985	5.667	1.853	5.763	2.319	4.69376
aeg 163	Ae.aegypti	Sri Ganganagar	Sri Ganganagar railway station	SG_01	29°55'55.5"N	73°52'22.1"E	4.701	2.68	6.581	2.908	6.774	3.039	6.853	3.224	6.835	3.4	6.616	3.593	6.308	3.769	5.737	3.918	5.166	3.997	4.103	4.05	3.672	3.417	4.437	3.435	4.463	3.277	4.683	3.294	4.709	3.189	4.647	3.066	5.465	3.022	5.386	3.479	4.57318
aeg 164	Ae.aegypti	Sri Ganganagar	Sri Ganganagar railway station	SG_01	29°55'55.5"N	73°52'22.1"E	4.499	1.432	6.475	1.642	6.668	1.835	6.774	2.029	6.739	2.205	6.537	2.407	6.159	2.556	5.596	2.67	4.867	2.82	3.927	2.943	3.4	2.248	4.208	2.222	4.287	2.073	4.516	2.09	4.56	1.985	4.437	1.862	5.219	1.792	5.412	2.292	4.79518
aeg 165	Ae.aegypti	Sri Ganganagar	Sri Ganganagar railway station	SG_01	29°55'55.5"N	73°52'22.1"E	4.912	1.388	6.792	1.686	6.958	1.862	6.994	2.055	6.932	2.196	6.73	2.38	6.387	2.521	5.799	2.653	5.139	2.749	4.138	2.855	3.646	2.161	4.419	2.152	4.48	2.011	4.753	2.029	4.788	1.932	4.674	1.818	5.482	1.748	5.561	2.248	4.76808
aeg 166	Ae.aegypti	Sri Ganganagar	Sri Ganganagar railway station	SG_01	29°55'55.5"N	73°52'22.1"E	5.158	2.337	6.871	2.732	7.046	2.916	7.125	3.118	7.073	3.259	6.827	3.452	6.37	3.593	5.878	3.69	5.21	3.769	4.199	3.795	3.865	3.101	4.533	3.101	4.595	2.951	4.779	2.995	4.867	2.908	4.806	2.732	5.5	2.732	5.579	3.233	4.73751
aeg 167	Ae.aegypti	Sri Ganganagar	Indra Chowk	SG_06	29°55'36.2"N	73°52'37.4"E	5.228	2.188	7.073	2.521	7.213	2.679	7.248	2.872	7.178	3.031	7.02	3.189	6.695	3.364	6.124	3.444	5.394	3.575	4.366	3.628	3.909	2.925	4.762	2.934	4.77	2.767	5.043	2.811	5.113	2.723	5.016	2.591	5.623	2.556	5.878	3.048	4.74392
aeg 168	Ae.aegypti	Sri Ganganagar	Indra Chowk	SG_06	29°55'36.2"N	73°52'37.4"E	4.772	2.337	6.721	2.697	6.915	2.846	6.967	3.048	6.932	3.25	6.642	3.417	6.247	3.567	5.658	3.69	4.946	3.76	3.918	3.725	3.452	3.048	4.296	3.074	4.313	2.951	4.577	2.969	4.656	2.872	4.524	2.776	5.192	2.732	5.35	3.224	4.98108
aeg 169	Ae.aegypti	Sri Ganganagar	Gurunanak Basti	SG_05	29°55'37.1"N	73°52'39.7"E	4.508	1.731	6.458	2.02	6.668	2.196	6.783	2.442	6.704	2.591	6.475	2.749	6.062	2.89	5.561	3.004	4.806	3.083	3.813	3.154	3.373	2.468	4.155	2.468	4.19	2.328	4.437	2.363	4.524	2.266	4.41	2.117	5.148	2.073	5.122	2.556	4.8229
aeg 170	Ae.aegypti	Sri Ganganagar	Gurunanak Basti	SG_05	29°55'37.1"N	73°52'39.7"E	4.394	2.355	6.37	2.582	6.581	2.758	6.651	2.969	6.607	3.118	6.317	3.285	5.922	3.479	5.403	3.611	4.691	3.786	3.751	3.892	3.241	3.189	3.988	3.154	4.015	3.013	4.261	3.013	4.331	2.934	4.19	2.776	4.999	2.688	5.016	3.154	4.89787
aeg 171	Ae.aegypti	Hoshiarpur	Uppal's om hospital	HP_01	31°31'13.1"N	75°54'44.5"E	2.346	0.751	3.29	0.886	3.364	0.952	3.4	1.053	3.395	1.141	3.255	1.247	3.096	1.321	2.824	1.383	2.481	1.436	1.941	1.488	1.69	1.102	2.134	1.128	2.134	1.049	2.253	1.049	2.284	1.001	2.253	0.944	2.609	0.913	2.648	1.146	2.41625
aeg 172	Ae.aegypti	Hoshiarpur	Uppal's om hospital	HP_01	31°31'13.1"N	75°54'44.5"E	2.772	0.883	3.518	1.009	3.58	1.084	3.615	1.163	3.589	1.255	3.483	1.33	3.29	1.4	3.035	1.462	2.745	1.51	2.292	1.55	2.108	1.242	2.477	1.247	2.499	1.176	2.613	1.176	2.639	1.137	2.6	1.071	2.864	1.049	2.956	1.273	2.11969
aeg 173	Ae.aegypti	Hoshiarpur	Uppal's om hospital	HP_01	31°31'13.1"N	75°54'44.5"E	2.289	0.848	3.237	0.97	3.307	1.036	3.316	1.093	3.321	1.207	3.211	1.313	3.031	1.405	2.798	1.493	2.433	1.559	1.954	1.607	1.704	1.277	2.077	1.26	2.077	1.172	2.183	1.176	2.218	1.128	2.165	1.08	2.552	1.018	2.582	1.269	2.37626
aeg 174	Ae.aegypti	Hoshiarpur	Uppal's om hospital	HP_01	31°31'13.1"N	75°54'44.5"E	2.482	0.83	3.466	1.014	3.523	1.084	3.54	1.172	3.518	1.247	3.417	1.339	3.294	1.396	3.009	1.453	2.609	1.502	2.077	1.493	1.906	1.181	2.336	1.19	2.358	1.111	2.473	1.119	2.49	1.075	2.464	1.014	2.78	0.987	2.824	1.225	2.34089
aeg 175	Ae.aegypti	Hoshiarpur	Uppal's om hospital	HP_01	31°31'13.1"N	75°54'44.5"E	2.395	1.643	3.149	1.827	3.233	1.897	3.246	2.007	3.237	2.09	3.149	2.169	3.009	2.218	2.745	2.248	2.363	2.301	1.928	2.314	1.682	1.963	2.077	1.967	2.099	1.91	2.205	1.945	2.244	1.893	2.196	1.831	2.499	1.835	2.53	2.046	2.22293
aeg 176	Ae.aegypti	Hoshiarpur	Uppal's om hospital	HP_01	31°31'13.1"N	75°54'44.5"E	2.491	0.98	3.294	1.067	3.4	1.132	3.466	1.238	3.461	1.33	3.36	1.414	3.167	1.524	2.894	1.607	2.569	1.664	2.112	1.699	1.853	1.374	2.235	1.374	2.244	1.291	2.363	1.295	2.389	1.251	2.367	1.203	2.644	1.168	2.741	1.374	2.28658
aeg 177	Ae.aegypti	Hoshiarpur	Uppal's om hospital	HP_01	31°31'13.1"N	75°54'44.5"E	2.377	1.164	3.321	1.361	3.386	1.422	3.413	1.51	3.4	1.611	3.268	1.708	3.083	1.783	2.846	1.84	2.495	1.875	2.016	1.888	1.77	1.532	2.165	1.563	2.174	1.488	2.27	1.493	2.297	1.444	2.226	1.37	2.631	1.37	2.657	1.598	2.36741
aeg 178	Ae.aegypti	Hoshiarpur	Uppal's om hospital	HP_01	31°31'13.1"N	75°54'44.5"E	2.544	0.523	3.347	0.658	3.417	0.715	3.479	0.829	3.457	0.908	3.334	0.992	3.158	1.067	2.921	1.111	2.604	1.168	2.147	1.176	1.985	0.856	2.345	0.873	2.345	0.812	2.464	0.812	2.508	0.768	2.433	0.706	2.741	0.697	2.828	0.908	2.12173
aeg 179	Ae.aegypti	Hoshiarpur	Uppal's om hospital	HP_01	31°31'13.1"N	75°54'44.5"E	2.641	0.694	3.492	0.838	3.553	0.908	3.606	1.005	3.593	1.089	3.492	1.185	3.281	1.282	3.031	1.339	2.705	1.392	2.191	1.414	1.985	1.053	2.367	1.089	2.367	1.009	2.499	1.009	2.53	0.961	2.473	0.891	2.771	0.878	2.833	1.106	2.32723
aeg 180	Ae.aegypti	Hoshiarpur	Uppal's om hospital	HP_01	31°31'13.1"N	75°54'44.5"E	2.544	0.756	3.474	0.86	3.571	0.926	3.624	1.031	3.606	1.137	3.492	1.234	3.272	1.33	3.013	1.379	2.67	1.453	2.205	1.502	1.897	1.159	2.323	1.159	2.314	1.084	2.446	1.062	2.481	1.018	2.464	0.966	2.78	0.926	2.815	1.159	2.42261
aeg 181	Ae.aegypti	Hoshiarpur	Uppal's om hospital	HP_01	31°31'13.1"N	75°54'44.5"E	2.324	0.879	3.259	1.049	3.312	1.111	3.342	1.194	3.329	1.269	3.255	1.339	3.096	1.427	2.837	1.488	2.473	1.524	1.976	1.528	1.796	1.225	2.183	1.216	2.174	1.15	2.292	1.163	2.319	1.119	2.284	1.071	2.604	1.045	2.639	1.247	2.24377
aeg 182	Ae.aegypti	Hoshiarpur	Uppal's om hospital	HP_01	31°31'13.1"N	75°54'44.5"E	2.267	0.729	3.237	0.882	3.316	0.97	3.351	1.062	3.338	1.132	3.224	1.216	3.048	1.304	2.784	1.374	2.411	1.422	1.893	1.453	1.73	1.115	2.147	1.119	2.187	1.04	2.275	1.058	2.31	1.005	2.248	0.939	2.552	0.922	2.618	1.15	2.32012
aeg 183	Ae.aegypti	Hoshiarpur	Uppal's om hospital	HP_01	31°31'13.1"N	75°54'44.5"E	2.039	1.441	3	1.545	3.096	1.62	3.145	1.717	3.123	1.805	3.009	1.897	2.842	1.98	2.565	2.046	2.226	2.108	1.726	2.121	1.51	1.778	1.906	1.792	1.919	1.717	2.051	1.726	2.06	1.686	2.033	1.629	2.35	1.607	2.429	1.827	2.32191
aeg 184	Ae.aegypti	Hoshiarpur	Uppal's om hospital	HP_01	31°31'13.1"N	75°54'44.5"E	2.337	1.402	3.325	1.449	3.417	1.537	3.448	1.611	3.426	1.699	3.329	1.783	3.197	1.875	2.938	1.963	2.582	2.033	2.09	2.051	1.866	1.77	2.284	1.748	2.275	1.668	2.38	1.682	2.407	1.638	2.35	1.567	2.714	1.537	2.806	1.752	2.26861
aeg 185	Ae.aegypti	Hoshiarpur	Uppal's om hospital	HP_01	31°31'13.1"N	75°54'44.5"E	2.175	1.199	3.132	1.295	3.237	1.37	3.281	1.462	3.277	1.545	3.162	1.651	2.969	1.752	2.705	1.827	2.367	1.888	1.897	1.932	1.603	1.572	2.038	1.589	2.042	1.524	2.156	1.524	2.191	1.453	2.13	1.4	2.358	1.383	2.446	1.585	2.37151
aeg 188	Ae.aegypti	Hoshiarpur	Tehsil office	HP_02	31°31'27.7"N	75°55'14.6"E	2.267	1.094	3.11	1.225	3.219	1.317	3.255	1.405	3.241	1.475	3.092	1.576	2.912	1.642	2.675	1.677	2.358	1.717	1.884	1.734	1.638	1.4	2.042	1.409	2.06	1.357	2.183	1.365	2.209	1.321	2.183	1.277	2.503	1.269	2.538	1.475	2.2328
aeg 189	Ae.aegypti	Hoshiarpur	Tehsil office	HP_02	31°31'27.7"N	75°55'14.6"E	2.228	1.006	3.215	1.15	3.277	1.212	3.321	1.304	3.307	1.405	3.202	1.488	3.044	1.563	2.758	1.629	2.415	1.677	1.972	1.704	1.699	1.365	2.112	1.383	2.112	1.295	2.218	1.304	2.248	1.251	2.205	1.19	2.464	1.176	2.582	1.4	2.31518
aeg 190	Ae.aegypti	Hoshiarpur	Tehsil office	HP_02	31°31'27.7"N	75°55'14.6"E	2.412	1.173	3.334	1.326	3.408	1.4	3.43	1.475	3.413	1.572	3.303	1.655	3.149	1.721	2.881	1.783	2.53	1.822	2.024	1.827	1.871	1.506	2.279	1.519	2.31	1.453	2.393	1.453	2.411	1.4	2.393	1.352	2.719	1.33	2.732	1.541	2.22965
aeg 191	Ae.aegypti	Hoshiarpur	Tehsil office	HP_02	31°31'27.7"N	75°55'14.6"E	2.333	1.415	3.316	1.519	3.395	1.607	3.43	1.704	3.435	1.77	3.334	1.866	3.167	1.954	2.89	2.024	2.516	2.077	2.055	2.125	1.805	1.8	2.2	1.796	2.196	1.721	2.297	1.726	2.306	1.682	2.248	1.62	2.534	1.589	2.639	1.805	2.3745
aeg 192	Ae.aegypti	Hoshiarpur	Tehsil office	HP_02	31°31'27.7"N	75°55'14.6"E	2.267	0.786	3.114	0.922	3.184	1.001	3.215	1.097	3.206	1.181	3.105	1.269	2.947	1.339	2.705	1.383	2.341	1.414	1.866	1.431	1.708	1.132	2.099	1.137	2.112	1.067	2.231	1.071	2.257	1.027	2.209	0.97	2.512	0.961	2.596	1.181	2.15354
aeg 193	Ae.aegypti	Hoshiarpur	New Civil line	HP_03	31°31'32.9"N	75°55'02.8"E	2.377	1.006	3.378	1.119	3.501	1.198	3.553	1.313	3.553	1.405	3.43	1.515	3.215	1.607	2.903	1.66	2.569	1.726	2.007	1.761	1.796	1.418	2.205	1.405	2.257	1.321	2.407	1.335	2.433	1.286	2.389	1.225	2.648	1.194	2.763	1.436	2.49388
aeg 194	Ae.aegypti	Hoshiarpur	New Civil line	HP_03	31°31'32.9"N	75°55'02.8"E	2.759	0.949	3.632	1.089	3.738	1.194	3.782	1.299	3.747	1.396	3.65	1.519	3.457	1.642	3.118	1.726	2.705	1.809	2.064	1.866	1.884	1.427	2.319	1.427	2.332	1.335	2.499	1.326	2.53	1.277	2.473	1.22	2.899	1.176	3.004	1.475	2.75967
aeg 195	Ae.aegypti	Hoshiarpur	New Civil line	HP_03	31°31'32.9"N	75°55'02.8"E	2.443	0.888	3.461	0.974	3.558	1.031	3.619	1.141	3.606	1.242	3.501	1.357	3.316	1.444	3.035	1.528	2.635	1.589	2.147	1.638	1.84	1.286	2.306	1.291	2.314	1.207	2.464	1.212	2.49	1.163	2.429	1.097	2.727	1.067	2.793	1.286	2.49119
aeg 196	Ae.aegypti	Hoshiarpur	New Civil line	HP_03	31°31'32.9"N	75°55'02.8"E	2.359	1.076	3.255	1.137	3.334	1.194	3.395	1.304	3.395	1.374	3.277	1.488	3.101	1.581	2.859	1.629	2.552	1.717	2.073	1.77	1.919	1.471	2.248	1.422	2.244	1.379	2.393	1.361	2.415	1.308	2.363	1.255	2.639	1.216	2.767	1.449	2.16231
aeg 197	Ae.aegypti	Itanagar	P-Sector	IT_01	27°05'52.1"N	93°38'05.6"E	1.541	0.582	2.342	0.66	2.408	0.716	2.45	0.794	2.437	0.873	2.345	0.948	2.195	1.027	1.959	1.095	1.612	1.174	1.226	1.22	0.955	0.932	1.328	0.912	1.341	0.86	1.482	0.86	1.498	0.807	1.429	0.758	1.747	0.726	1.769	0.915	2.09107
aeg 199	Ae.aegypti	Itanagar	P-Sector	IT_01	27°05'52.1"N	93°38'05.6"E	1.921	0.635	2.692	0.752	2.758	0.814	2.787	0.902	2.8	0.974	2.689	1.05	2.522	1.115	2.326	1.151	2.038	1.203	1.648	1.236	1.38	0.945	1.763	0.971	1.766	0.906	1.871	0.912	1.917	0.87	1.845	0.804	2.087	0.798	2.129	0.974	1.95528
aeg 200	Ae.aegypti	Itanagar	P-Sector	IT_01	27°05'52.1"N	93°38'05.6"E	1.669	1.276	2.437	1.439	2.519	1.511	2.558	1.596	2.522	1.668	2.421	1.747	2.264	1.802	2.038	1.861	1.75	1.913	1.324	1.91	1.154	1.619	1.482	1.619	1.495	1.557	1.589	1.557	1.609	1.518	1.58	1.472	1.913	1.465	1.907	1.655	2.00246
aeg 201	Ae.aegypti	Itanagar	P-Sector	IT_01	27°05'52.1"N	93°38'05.6"E	1.777	0.805	2.532	0.987	2.588	1.056	2.62	1.154	2.604	1.216	2.476	1.279	2.293	1.338	2.097	1.39	1.747	1.436	1.295	1.455	1.092	1.138	1.495	1.151	1.501	1.079	1.603	1.086	1.619	1.043	1.573	0.991	1.874	0.974	1.913	1.174	2.13874
aeg 202	Ae.aegypti	Itanagar	P-Sector	IT_01	27°05'52.1"N	93°38'05.6"E	1.947	0.838	2.787	0.958	2.836	1.017	2.862	1.079	2.853	1.174	2.738	1.233	2.578	1.285	2.358	1.328	2.103	1.37	1.655	1.38	1.491	1.131	1.848	1.138	1.848	1.072	1.963	1.079	2.005	1.04	1.969	0.997	2.172	0.964	2.234	1.158	1.92455
aeg 203	Ae.aegypti	Itanagar	P-Sector	IT_01	27°05'52.1"N	93°38'05.6"E	1.724	1.155	2.588	1.311	2.656	1.393	2.673	1.482	2.64	1.55	2.542	1.629	2.378	1.684	2.165	1.73	1.913	1.779	1.468	1.773	1.275	1.495	1.609	1.501	1.616	1.432	1.711	1.432	1.747	1.39	1.727	1.334	2.015	1.328	2.031	1.521	2.00228
aeg 204	Ae.aegypti	Itanagar	P-Sector	IT_01	27°05'52.1"N	93°38'05.6"E	1.852	1.319	2.725	1.459	2.807	1.524	2.83	1.622	2.81	1.701	2.705	1.769	2.522	1.841	2.293	1.91	1.963	1.976	1.531	2.005	1.324	1.691	1.724	1.694	1.711	1.619	1.809	1.616	1.832	1.567	1.789	1.521	2.129	1.495	2.136	1.697	2.14521
aeg 205	Ae.aegypti	Itanagar	P-Sector	IT_01	27°05'52.1"N	93°38'05.6"E	1.852	1.113	2.679	1.275	2.741	1.344	2.774	1.419	2.751	1.495	2.637	1.563	2.46	1.612	2.254	1.642	1.976	1.681	1.609	1.688	1.354	1.393	1.753	1.41	1.753	1.357	1.858	1.364	1.887	1.331	1.874	1.279	2.149	1.282	2.149	1.468	1.93441
aeg 206	Ae.aegypti	Itanagar	P-Sector	IT_01	27°05'52.1"N	93°38'05.6"E	1.908	0.834	2.735	1.004	2.804	1.079	2.817	1.164	2.774	1.249	2.66	1.321	2.529	1.37	2.313	1.426	2.021	1.472	1.573	1.455	1.429	1.158	1.756	1.184	1.786	1.102	1.868	1.115	1.894	1.069	1.858	1.027	2.205	1.014	2.198	1.213	1.99854
aeg 207	Ae.aegypti	Itanagar	P-Sector	IT_01	27°05'52.1"N	93°38'05.6"E	1.836	0.969	2.63	1.082	2.692	1.148	2.722	1.223	2.715	1.298	2.61	1.367	2.444	1.416	2.241	1.455	1.972	1.504	1.563	1.514	1.374	1.252	1.717	1.259	1.727	1.203	1.822	1.21	1.848	1.164	1.809	1.118	2.09	1.105	2.129	1.292	1.8965
aeg 208	Ae.aegypti	Itanagar	P-Sector	IT_01	27°05'52.1"N	93°38'05.6"E	1.764	1.106	2.538	1.259	2.627	1.321	2.63	1.413	2.63	1.485	2.519	1.554	2.355	1.625	2.1	1.678	1.773	1.72	1.364	1.727	1.138	1.419	1.495	1.439	1.518	1.37	1.648	1.383	1.678	1.338	1.622	1.298	1.959	1.269	1.927	1.462	2.11366
aeg 209	Ae.aegypti	Itanagar	P-Sector	IT_01	27°05'52.1"N	93°38'05.6"E	1.823	0.756	2.627	0.925	2.689	0.994	2.725	1.082	2.709	1.148	2.61	1.22	2.394	1.318	2.152	1.364	1.874	1.403	1.442	1.357	1.324	1.066	1.655	1.086	1.675	1.036	1.769	1.036	1.786	1.004	1.756	0.951	2.028	0.948	2.071	1.154	2.02537
aeg 210	Ae.aegypti	Itanagar	P-Sector	IT_01	27°05'52.1"N	93°38'05.6"E	1.744	0.969	2.565	1.066	2.653	1.118	2.699	1.2	2.689	1.298	2.571	1.364	2.404	1.426	2.185	1.462	1.927	1.504	1.537	1.534	1.285	1.272	1.665	1.269	1.675	1.213	1.773	1.213	1.796	1.184	1.76	1.135	1.976	1.095	2.031	1.288	1.9405
aeg 211	Ae.aegypti	Itanagar	Bozo Apartment	IT_02	27°06'01.1"N	93°37'56.6"E	1.731	0.72	2.601	0.798	2.702	0.876	2.745	0.964	2.712	1.036	2.607	1.108	2.45	1.177	2.201	1.246	1.927	1.308	1.504	1.344	1.269	1.053	1.652	1.046	1.665	0.987	1.783	0.991	1.805	0.935	1.766	0.893	2.015	0.873	2.031	1.053	2.04173
aeg 212	Ae.aegypti	Itanagar	Bozo Apartment	IT_02	27°06'01.1"N	93°37'56.6"E	1.682	0.671	2.542	0.791	2.604	0.853	2.633	0.938	2.617	1.014	2.509	1.089	2.349	1.158	2.136	1.194	1.848	1.226	1.482	1.256	1.292	0.974	1.596	0.974	1.599	0.919	1.74	0.938	1.763	0.886	1.737	0.834	2.015	0.817	1.992	0.997	1.9203
aeg 213	Ae.aegypti	Itanagar	Bozo Apartment	IT_02	27°06'01.1"N	93°37'56.6"E	1.849	0.808	2.686	0.961	2.771	1.033	2.784	1.125	2.748	1.194	2.646	1.269	2.493	1.338	2.234	1.374	1.93	1.41	1.534	1.442	1.311	1.122	1.681	1.141	1.711	1.076	1.776	1.089	1.799	1.036	1.737	0.984	2.067	0.971	2.103	1.171	2.08448
aeg 214	Ae.aegypti	Itanagar	Bozo Apartment	IT_02	27°06'01.1"N	93°37'56.6"E	1.803	0.33	2.66	0.447	2.741	0.526	2.781	0.611	2.754	0.696	2.643	0.768	2.47	0.84	2.237	0.893	1.953	0.951	1.511	0.981	1.311	0.667	1.675	0.673	1.688	0.601	1.786	0.614	1.805	0.572	1.747	0.519	2.067	0.493	2.09	0.69	2.0812
aeg 215	Ae.aegypti	Itanagar	Bozo Apartment	IT_02	27°06'01.1"N	93°37'56.6"E	1.672	0.766	2.61	0.889	2.686	0.961	2.728	1.056	2.725	1.125	2.604	1.21	2.411	1.266	2.182	1.331	1.897	1.383	1.498	1.4	1.252	1.108	1.609	1.108	1.645	1.046	1.727	1.056	1.75	1.004	1.717	0.948	1.992	0.938	2.021	1.122	2.08969
aeg 216	Ae.aegypti	Itanagar	Bozo Apartment	IT_02	27°06'01.1"N	93°37'56.6"E	1.862	0.638	2.581	0.755	2.66	0.821	2.699	0.909	2.686	0.984	2.581	1.053	2.411	1.112	2.198	1.161	1.91	1.2	1.521	1.207	1.37	0.942	1.655	0.942	1.652	0.886	1.756	0.893	1.786	0.85	1.747	0.794	2.093	0.794	2.044	0.964	1.92327
aeg 217	Ae.aegypti	Itanagar	Bozo Apartment	IT_02	27°06'01.1"N	93°37'56.6"E	1.806	0.573	2.754	0.742	2.843	0.811	2.908	0.919	2.869	1.004	2.754	1.086	2.588	1.161	2.313	1.22	1.963	1.266	1.56	1.272	1.252	0.909	1.681	0.942	1.681	0.866	1.796	0.883	1.812	0.834	1.773	0.768	2.084	0.755	2.129	0.968	2.30185
aeg 218	Ae.aegypti	Itanagar	Bozo Apartment	IT_02	27°06'01.1"N	93°37'56.6"E	1.643	0.596	2.466	0.673	2.555	0.742	2.604	0.847	2.568	0.932	2.463	1.014	2.293	1.089	2.044	1.154	1.73	1.23	1.338	1.279	1.089	0.964	1.455	0.951	1.472	0.883	1.56	0.886	1.56	0.837	1.504	0.775	1.835	0.755	1.874	0.955	2.14636
aeg 219	Ae.aegypti	Itanagar	Bozo Apartment	IT_02	27°06'01.1"N	93°37'56.6"E	1.842	0.684	2.709	0.817	2.804	0.893	2.83	0.961	2.81	1.036	2.709	1.108	2.548	1.187	2.319	1.249	2.028	1.308	1.603	1.328	1.403	1.033	1.763	1.043	1.776	0.984	1.871	0.984	1.894	0.929	1.828	0.886	2.149	0.86	2.175	1.056	2.03248
aeg 220	Ae.aegypti	Itanagar	Bozo Apartment	IT_02	27°06'01.1"N	93°37'56.6"E	1.783	1.06	2.646	1.105	2.764	1.184	2.81	1.285	2.79	1.367	2.699	1.455	2.496	1.54	2.286	1.609	1.927	1.697	1.455	1.756	1.174	1.462	1.573	1.426	1.557	1.354	1.694	1.347	1.717	1.302	1.593	1.239	1.966	1.2	2.041	1.416	2.3279
aeg 221	Ae.aegypti	Itanagar	Bozo Apartment	IT_02	27°06'01.1"N	93°37'56.6"E	1.718	0.51	2.673	0.559	2.758	0.624	2.79	0.716	2.79	0.781	2.689	0.876	2.529	0.948	2.316	1.017	1.995	1.089	1.57	1.144	1.364	0.876	1.694	0.843	1.707	0.791	1.789	0.785	1.812	0.749	1.779	0.696	2.067	0.654	2.11	0.84	2.08997
aeg 222	Ae.aegypti	Itanagar	D-Sector	IT_03	27°05'42.4"N	93°37'12.6"E	1.852	0.658	2.738	0.762	2.8	0.814	2.826	0.902	2.817	0.968	2.712	1.056	2.522	1.141	2.28	1.213	2.005	1.252	1.554	1.298	1.341	1.02	1.697	1.007	1.707	0.945	1.874	0.932	1.894	0.899	1.871	0.847	2.123	0.804	2.129	1.004	2.09519
aeg 223	Ae.aegypti	Itanagar	D-Sector	IT_03	27°05'42.4"N	93°37'12.6"E	1.675	0.7	2.624	0.771	2.751	0.834	2.781	0.909	2.771	0.984	2.646	1.082	2.535	1.164	2.277	1.239	1.953	1.311	1.472	1.39	1.171	1.076	1.573	1.063	1.567	1	1.688	0.978	1.694	0.945	1.606	0.899	2.038	0.847	2.087	1.043	2.29233
aeg 224	Ae.aegypti	Itanagar	D-Sector	IT_03	27°05'42.4"N	93°37'12.6"E	1.721	0.874	2.601	1.004	2.686	1.086	2.709	1.174	2.689	1.243	2.581	1.318	2.401	1.4	2.165	1.449	1.871	1.485	1.426	1.501	1.18	1.2	1.56	1.213	1.57	1.148	1.747	1.148	1.783	1.108	1.724	1.059	1.956	1.033	2.018	1.233	2.12164
aeg 225	Ae.aegypti	Itanagar	D-Sector	IT_03	27°05'42.4"N	93°37'12.6"E	1.829	0.779	2.663	0.889	2.754	0.955	2.807	1.036	2.8	1.112	2.696	1.197	2.548	1.272	2.326	1.344	1.966	1.426	1.475	1.495	1.19	1.161	1.609	1.148	1.619	1.082	1.704	1.082	1.72	1.043	1.691	0.991	2.044	0.951	2.093	1.164	2.27325
aeg 226	Ae.aegypti	Itanagar	D-Sector	IT_03	27°05'42.4"N	93°37'12.6"E	1.796	0.985	2.653	1.131	2.718	1.197	2.754	1.275	2.751	1.347	2.627	1.436	2.444	1.488	2.214	1.544	1.917	1.593	1.449	1.619	1.184	1.288	1.557	1.298	1.586	1.233	1.671	1.243	1.691	1.207	1.645	1.151	2.084	1.144	2.041	1.344	2.21518
aeg 227	Ae.aegypti	Itanagar	D-Sector	IT_03	27°05'42.4"N	93°37'12.6"E	2.228	0.931	2.956	1.08	3.044	1.124	3.079	1.229	3.074	1.317	2.969	1.409	2.784	1.484	2.543	1.55	2.235	1.607	1.778	1.655	1.466	1.299	1.875	1.299	1.884	1.229	1.976	1.247	1.994	1.198	1.932	1.146	2.292	1.115	2.35	1.335	2.27194
aeg 228	Ae.aegypti	Itanagar	D-Sector	IT_03	27°05'42.4"N	93°37'12.6"E	1.721	0.615	2.663	0.798	2.735	0.883	2.761	0.948	2.732	1.02	2.64	1.099	2.447	1.167	2.211	1.2	1.933	1.243	1.491	1.266	1.207	0.919	1.554	0.938	1.57	0.873	1.668	0.899	1.681	0.843	1.639	0.785	2.077	0.791	2.044	0.997	2.22616
aeg 229	Ae.aegypti	Itanagar	D-Sector	IT_03	27°05'42.4"N	93°37'12.6"E	1.744	1.054	2.614	1.174	2.656	1.216	2.722	1.318	2.699	1.387	2.617	1.475	2.463	1.563	2.179	1.632	1.861	1.711	1.419	1.776	1.122	1.436	1.495	1.423	1.508	1.354	1.625	1.347	1.652	1.308	1.586	1.252	1.848	1.226	1.963	1.436	2.27884
aeg 231	Ae.aegypti	Kolkata	Bowbazar	KK_01	22°34'00.8"N	88°21'28.7"E	1.921	0.71	2.62	0.847	2.679	0.915	2.725	1	2.715	1.086	2.604	1.154	2.417	1.213	2.224	1.266	1.936	1.311	1.593	1.331	1.357	1.02	1.697	1.04	1.707	0.968	1.805	0.984	1.825	0.935	1.776	0.886	2.071	0.883	2.09	1.066	1.91925
aeg 232	Ae.aegypti	Kolkata	Bowbazar	KK_01	22°34'00.8"N	88°21'28.7"E	1.901	0.913	2.663	1.086	2.745	1.151	2.777	1.243	2.774	1.324	2.653	1.39	2.476	1.455	2.25	1.488	1.94	1.534	1.498	1.544	1.282	1.23	1.648	1.259	1.655	1.187	1.776	1.203	1.796	1.148	1.727	1.086	2.123	1.089	2.103	1.295	2.11272
aeg 233	Ae.aegypti	Kolkata	Bowbazar	KK_01	22°34'00.8"N	88°21'28.7"E	1.852	0.34	2.768	0.506	2.83	0.572	2.866	0.66	2.853	0.719	2.732	0.794	2.568	0.866	2.296	0.912	2.048	0.951	1.521	0.987	1.36	0.667	1.733	0.696	1.747	0.627	1.855	0.641	1.881	0.598	1.871	0.529	2.195	0.529	2.214	0.732	2.13522
aeg 234	Ae.aegypti	Kolkata	Janbazar	KK_02	22°33'45.9"N	88°21'21.8"E	1.685	0.749	2.496	0.817	2.581	0.876	2.63	0.964	2.61	1.03	2.512	1.108	2.355	1.177	2.152	1.246	1.894	1.315	1.514	1.357	1.302	1.092	1.619	1.079	1.622	1.014	1.714	1.014	1.733	0.971	1.671	0.915	1.956	0.879	1.999	1.079	1.90036
aeg 235	Ae.aegypti	Kolkata	Janbazar	KK_02	22°33'45.9"N	88°21'21.8"E	1.819	1.077	2.646	1.233	2.722	1.295	2.761	1.396	2.761	1.465	2.633	1.534	2.437	1.58	2.205	1.612	1.956	1.639	1.475	1.671	1.295	1.374	1.645	1.367	1.681	1.315	1.796	1.334	1.819	1.302	1.789	1.249	2.051	1.249	2.077	1.432	2.04917
aeg 236	Ae.aegypti	Kolkata	Janbazar	KK_02	22°33'45.9"N	88°21'21.8"E	1.908	1.139	2.738	1.305	2.79	1.357	2.807	1.429	2.787	1.518	2.686	1.576	2.509	1.635	2.286	1.684	1.982	1.717	1.586	1.73	1.416	1.455	1.711	1.455	1.73	1.406	1.855	1.413	1.887	1.364	1.848	1.318	2.061	1.311	2.179	1.498	2.00735
aeg 237	Ae.aegypti	Kolkata	Janbazar	KK_02	22°33'45.9"N	88°21'21.8"E	1.695	0.625	2.512	0.722	2.594	0.794	2.633	0.873	2.61	0.951	2.512	1.017	2.345	1.082	2.11	1.135	1.851	1.203	1.446	1.213	1.246	0.955	1.547	0.929	1.554	0.883	1.668	0.893	1.704	0.857	1.681	0.794	1.966	0.775	1.989	0.961	1.97708
aeg 238	Ae.aegypti	Kolkata	Janbazar	KK_02	22°33'45.9"N	88°21'21.8"E	1.286	0.573	2.107	0.624	2.211	0.703	2.264	0.794	2.254	0.876	2.113	0.951	1.927	1.017	1.697	1.072	1.4	1.108	0.984	1.148	0.788	0.883	1.138	0.863	1.138	0.834	1.23	0.834	1.249	0.788	1.216	0.719	1.55	0.699	1.57	0.899	2.07647
aeg 240	Ae.aegypti	Kolkata	Janbazar	KK_02	22°33'45.9"N	88°21'21.8"E	2.012	1.018	2.728	1.151	2.787	1.19	2.853	1.295	2.83	1.357	2.715	1.429	2.565	1.482	2.322	1.518	2.061	1.557	1.671	1.573	1.442	1.311	1.802	1.311	1.809	1.252	1.917	1.259	1.949	1.226	1.92	1.187	2.195	1.164	2.162	1.324	1.92261
aeg 241	Ae.aegypti	Kolkata	Janbazar	KK_02	22°33'45.9"N	88°21'21.8"E	1.774	0.74	2.656	0.899	2.705	0.951	2.754	1.02	2.709	1.102	2.61	1.158	2.512	1.2	2.195	1.252	1.933	1.279	1.478	1.292	1.259	1.014	1.645	1.014	1.665	0.978	1.773	0.994	1.799	0.938	1.779	0.896	2.028	0.889	2.067	1.086	2.05495
aeg 242	Ae.aegypti	Kolkata	Janbazar	KK_02	22°33'45.9"N	88°21'21.8"E	1.842	0.828	2.705	0.964	2.781	1.027	2.807	1.118	2.784	1.18	2.66	1.272	2.493	1.338	2.273	1.387	1.966	1.432	1.501	1.449	1.315	1.135	1.694	1.171	1.694	1.099	1.805	1.108	1.828	1.066	1.786	1.004	2.097	0.991	2.136	1.197	2.10462
aeg 243	Ae.aegypti	Kolkata	Janbazar	KK_02	22°33'45.9"N	88°21'21.8"E	1.708	0.563	2.516	0.722	2.601	0.794	2.633	0.866	2.62	0.948	2.516	1.023	2.326	1.079	2.084	1.122	1.822	1.154	1.41	1.151	1.216	0.86	1.56	0.879	1.567	0.821	1.691	0.827	1.724	0.791	1.684	0.739	1.94	0.732	1.989	0.922	1.9953
aeg 245	Ae.aegypti	Kolkata	Janbazar	KK_02	22°33'45.9"N	88°21'21.8"E	1.842	0.582	2.568	0.703	2.637	0.778	2.669	0.857	2.646	0.935	2.548	0.994	2.385	1.056	2.182	1.112	1.913	1.174	1.521	1.18	1.338	0.909	1.635	0.909	1.665	0.853	1.783	0.86	1.822	0.811	1.704	0.739	2.054	0.726	2.051	0.932	1.89714
aeg 246	Ae.aegypti	Kolkata	Janbazar	KK_02	22°33'45.9"N	88°21'21.8"E	1.728	0.56	2.414	0.66	2.496	0.722	2.542	0.814	2.519	0.889	2.421	0.955	2.27	1.02	2.028	1.069	1.792	1.135	1.367	1.18	1.148	0.893	1.472	0.879	1.491	0.817	1.573	0.817	1.603	0.775	1.531	0.722	1.9	0.696	1.923	0.902	1.97001
aeg 247	Ae.aegypti	Kolkata	Howrah	KK_03	22°34'53.7"N	88°19'54.0"E	1.78	0.88	2.61	1.017	2.63	1.072	2.65	1.148	2.65	1.213	2.542	1.279	2.362	1.321	2.146	1.367	1.897	1.403	1.524	1.396	1.334	1.125	1.658	1.141	1.671	1.076	1.773	1.102	1.802	1.063	1.76	1.01	2.054	1.007	2.038	1.197	1.87076
aeg 248	Ae.aegypti	Kolkata	Howrah	KK_03	22°34'53.7"N	88°19'54.0"E	1.793	0.906	2.604	0.994	2.65	1.05	2.696	1.141	2.666	1.2	2.558	1.266	2.424	1.318	2.195	1.37	1.966	1.426	1.576	1.439	1.403	1.171	1.701	1.174	1.72	1.115	1.825	1.122	1.868	1.086	1.832	1.059	2.113	1.027	2.116	1.203	1.81806
aeg 249	Ae.aegypti	Kolkata	Howrah	KK_03	22°34'53.7"N	88°19'54.0"E	1.901	1.116	2.614	1.243	2.692	1.321	2.722	1.406	2.715	1.462	2.594	1.534	2.434	1.576	2.201	1.612	1.894	1.655	1.504	1.639	1.282	1.357	1.642	1.37	1.671	1.311	1.75	1.318	1.776	1.288	1.766	1.249	2.084	1.252	2.093	1.432	1.99499
aeg 250	Ae.aegypti	Kolkata	Howrah	KK_03	22°34'53.7"N	88°19'54.0"E	1.908	1.132	2.686	1.259	2.754	1.324	2.768	1.416	2.758	1.504	2.64	1.583	2.48	1.645	2.237	1.671	1.966	1.697	1.534	1.697	1.406	1.416	1.727	1.429	1.747	1.36	1.851	1.383	1.894	1.344	1.851	1.292	2.149	1.282	2.188	1.485	1.95796
aeg 251	Ae.aegypti	Kolkata	Howrah	KK_03	22°34'53.7"N	88°19'54.0"E	1.702	0.969	2.506	1.043	2.607	1.122	2.643	1.207	2.63	1.295	2.522	1.374	2.368	1.442	2.123	1.501	1.835	1.56	1.416	1.625	1.207	1.338	1.537	1.315	1.544	1.252	1.648	1.243	1.675	1.2	1.609	1.154	1.894	1.115	1.985	1.318	2.06534
aeg 252	Ae.aegypti	Kolkata	Howrah	KK_03	22°34'53.7"N	88°19'54.0"E	1.934	1.168	2.758	1.357	2.83	1.439	2.856	1.537	2.823	1.609	2.722	1.668	2.538	1.714	2.293	1.743	1.999	1.773	1.619	1.789	1.393	1.462	1.733	1.488	1.75	1.419	1.851	1.429	1.884	1.393	1.855	1.338	2.185	1.344	2.169	1.537	2.07081
aeg 253	Ae.aegypti	Kolkata	Howrah	KK_03	22°34'53.7"N	88°19'54.0"E	1.636	1.194	2.473	1.302	2.555	1.374	2.597	1.455	2.571	1.524	2.47	1.603	2.332	1.661	2.11	1.717	1.776	1.773	1.377	1.776	1.144	1.498	1.491	1.501	1.518	1.432	1.622	1.442	1.665	1.403	1.619	1.347	1.9	1.341	1.936	1.531	2.03408
aeg 254	Ae.aegypti	Kolkata	Howrah	KK_03	22°34'53.7"N	88°19'54.0"E	1.826	0.759	2.617	0.889	2.692	0.961	2.722	1.056	2.686	1.131	2.604	1.21	2.44	1.272	2.221	1.311	1.946	1.338	1.521	1.38	1.387	1.102	1.688	1.086	1.691	1.027	1.799	1.036	1.825	0.991	1.802	0.935	2.093	0.912	2.133	1.135	1.93721
aeg 255	Ae.aegypti	Kolkata	Baksara	KK_04	22°34'48.0"N	88°17'19.0"E	1.793	0.857	2.679	0.902	2.738	0.948	2.774	1.033	2.748	1.118	2.679	1.177	2.532	1.246	2.316	1.308	1.992	1.367	1.622	1.403	1.374	1.128	1.75	1.131	1.743	1.069	1.845	1.066	1.9	1.036	1.848	0.984	2.097	0.951	2.188	1.141	1.95968
aeg 256	Ae.aegypti	Kolkata	Baksara	KK_04	22°34'48.0"N	88°17'19.0"E	1.829	1.005	2.676	1.161	2.764	1.226	2.79	1.308	2.764	1.396	2.66	1.462	2.489	1.527	2.224	1.576	1.949	1.632	1.544	1.642	1.262	1.311	1.675	1.344	1.681	1.275	1.766	1.282	1.805	1.243	1.773	1.19	2.09	1.187	2.103	1.377	2.10899
aeg 257	Ae.aegypti	Kolkata	Baksara	KK_04	22°34'48.0"N	88°17'19.0"E	1.499	1.099	2.306	1.22	2.381	1.266	2.411	1.364	2.404	1.429	2.3	1.488	2.103	1.57	1.904	1.619	1.609	1.675	1.2	1.704	0.945	1.416	1.344	1.426	1.351	1.364	1.449	1.364	1.488	1.328	1.455	1.285	1.766	1.262	1.792	1.452	2.01608
aeg 258	Ae.aegypti	Kolkata	Baksara	KK_04	22°34'48.0"N	88°17'19.0"E	1.826	1.106	2.669	1.288	2.748	1.351	2.79	1.446	2.758	1.527	2.62	1.596	2.47	1.648	2.231	1.688	1.927	1.733	1.498	1.737	1.243	1.419	1.645	1.436	1.665	1.37	1.753	1.38	1.776	1.338	1.743	1.285	2.136	1.292	2.067	1.475	2.13195
aeg 259	Ae.aegypti	Kolkata	Baksara	KK_04	22°34'48.0"N	88°17'19.0"E	1.738	1.191	2.594	1.259	2.656	1.315	2.673	1.406	2.673	1.485	2.588	1.56	2.453	1.639	2.192	1.694	1.891	1.73	1.501	1.756	1.308	1.475	1.642	1.491	1.668	1.423	1.76	1.449	1.786	1.41	1.73	1.351	2.074	1.318	2.097	1.531	1.9726
aeg 260	Ae.aegypti	Lucknow	Hotel Kanha Inn	LK_01	26°50'32.8"N	80°55'09.9"E	2.039	1.087	3.159	1.232	3.255	1.316	3.317	1.433	3.309	1.558	3.18	1.671	2.954	1.78	2.636	1.88	2.244	1.955	1.592	1.993	1.295	1.567	1.792	1.575	1.805	1.479	1.976	1.483	2.01	1.433	1.943	1.341	2.352	1.299	2.402	1.587	2.87929
aeg 261	Ae.aegypti	Lucknow	Hotel Kanha Inn	LK_01	26°50'32.8"N	80°55'09.9"E	2.499	0.928	3.51	1.207	3.623	1.307	3.656	1.445	3.635	1.562	3.497	1.633	3.255	1.709	2.962	1.767	2.532	1.788	1.926	1.755	1.65	1.295	2.185	1.383	2.206	1.299	2.365	1.312	2.386	1.266	2.352	1.182	2.753	1.174	2.749	1.462	2.80282
aeg 262	Ae.aegypti	Lucknow	LDA Colony	LK_02	26°47'22.0"N	80°54'39.8"E	1.872	0.836	2.996	0.864	3.079	0.927	3.129	1.044	3.121	1.149	3	1.253	2.791	1.391	2.528	1.5	2.131	1.613	1.658	1.721	1.366	1.374	1.775	1.211	1.775	1.303	1.775	1.211	1.905	1.149	1.867	1.082	2.227	1.027	2.285	1.261	2.62886
aeg 263	Ae.aegypti	Lucknow	LDA Colony	LK_02	26°47'22.0"N	80°54'39.8"E	2.503	1.145	3.518	1.287	3.614	1.366	3.664	1.496	3.639	1.608	3.489	1.696	3.28	1.788	2.996	1.859	2.615	1.926	2.11	1.968	1.842	1.567	2.289	1.579	2.281	1.487	2.411	1.504	2.444	1.45	2.39	1.374	2.716	1.349	2.778	1.583	2.59275
aeg 264	Ae.aegypti	Lucknow	Alambagh Bus stand	LK_03	26°49'05.8"N	80°54'29.2"E	2.035	0.886	3.063	0.848	3.163	0.91	3.246	1.019	3.276	1.124	3.155	1.249	2.979	1.374	2.72	1.5	2.365	1.65	1.796	1.784	1.454	1.445	1.909	1.378	1.88	1.295	2.026	1.266	2.039	1.207	1.976	1.144	2.306	1.061	2.402	1.299	2.63956
aeg 265	Ae.aegypti	Lucknow	Alambagh Bus stand	LK_03	26°49'05.8"N	80°54'29.2"E	2.344	1.049	3.309	1.211	3.43	1.299	3.48	1.433	3.464	1.529	3.343	1.613	3.134	1.7	2.862	1.78	2.469	1.851	1.901	1.876	1.638	1.491	2.089	1.5	2.106	1.416	2.264	1.441	2.302	1.378	2.193	1.287	2.494	1.27	2.599	1.516	2.61201
aeg 266	Ae.aegypti	Lucknow	Janki Vihar Colony	LK_04	26°55'12.0"N	80°56'50.9"E	2.244	1.216	3.146	1.47	3.213	1.567	3.234	1.667	3.209	1.734	3.079	1.817	2.87	1.872	2.59	1.888	2.273	1.918	1.792	1.892	1.587	1.541	1.968	1.575	1.976	1.512	2.093	1.525	2.131	1.483	2.11	1.408	2.469	1.433	2.469	1.663	2.35928
aeg 267	Ae.aegypti	Lucknow	Shankar Nagar Colony	LK_05	26°54'50.5"N	80°57'51.1"E	2.135	0.857	3.272	0.848	3.372	0.915	3.426	1.032	3.422	1.144	3.33	1.274	3.125	1.42	2.829	1.529	2.398	1.767	1.842	1.93	1.445	1.55	1.901	1.45	1.892	1.349	2.055	1.333	2.068	1.253	2.005	1.182	2.394	1.082	2.511	1.349	2.96342
aeg 268	Ae.aegypti	Lucknow	Shankar Nagar Colony	LK_05	26°54'50.5"N	80°57'51.1"E	2.566	1.045	3.543	1.199	3.643	1.282	3.689	1.399	3.673	1.575	3.56	1.617	3.334	1.7	3.054	1.784	2.628	1.88	2.06	1.934	1.78	1.541	2.206	1.533	2.202	1.433	2.373	1.433	2.415	1.378	2.34	1.303	2.766	1.27	2.816	1.525	2.75877
aeg 269	Ae.aegypti	Lucknow	Tilak nagar	LK_06	26°50'40.2"N	80°54'45.2"E	2.311	1.166	3.146	1.512	3.175	1.583	3.175	1.696	3.121	1.755	3.004	1.801	2.803	1.83	2.569	1.842	2.218	1.817	1.788	1.75	1.608	1.366	1.943	1.441	1.968	1.374	2.114	1.424	2.16	1.387	2.127	1.324	2.498	1.395	2.44	1.579	2.27817
aeg 270	Ae.aegypti	Lucknow	Tilak nagar	LK_06	26°50'40.2"N	80°54'45.2"E	2.495	1.132	3.334	1.583	3.397	1.684	3.397	1.796	3.359	1.892	3.209	1.918	2.992	1.934	2.762	1.884	2.406	1.813	1.943	1.73	1.78	1.291	2.143	1.42	2.156	1.358	2.323	1.42	2.365	1.378	2.327	1.312	2.657	1.395	2.624	1.617	2.39976
aeg 271	Ae.aegypti	Lucknow	Indralok colony	LK_07	26°47'51.8"N	80°52'42.4"E	2.198	1.066	3.079	0.982	3.175	1.032	3.251	1.119	3.242	1.228	3.167	1.316	2.979	1.458	2.758	1.571	2.415	1.734	2.001	1.867	1.658	1.596	2.022	1.504	2.018	1.445	2.127	1.416	2.143	1.37	2.055	1.328	2.335	1.216	2.511	1.399	2.37245
aeg 272	Ae.aegypti	Lucknow	Indralok colony	LK_07	26°47'51.8"N	80°52'42.4"E	2.461	1.149	3.272	1.6	3.347	1.709	3.347	1.805	3.28	1.897	3.146	1.934	2.962	1.947	2.661	1.901	2.377	1.855	1.876	1.713	1.792	1.324	2.106	1.437	2.139	1.383	2.244	1.424	2.277	1.378	2.277	1.307	2.615	1.412	2.59	1.642	2.36645
aeg 273	Ae.aegypti	Lucknow	Ashutosh nagar	LK_08	26°48'03.8"N	80°52'51.5"E	2.227	0.681	3.192	0.626	3.28	0.693	3.347	0.798	3.347	0.89	3.217	0.998	3.058	1.115	2.812	1.22	2.494	1.383	2.03	1.512	1.709	1.216	2.076	1.124	2.076	1.057	2.202	1.044	2.244	0.973	2.193	0.931	2.469	0.848	2.578	1.048	2.40906
aeg 274	Ae.aegypti	Lucknow	Ashutosh nagar	LK_08	26°48'03.8"N	80°52'51.5"E	2.449	1.379	3.171	2.055	3.205	2.164	3.18	2.26	3.096	2.352	2.946	2.335	2.762	2.281	2.515	2.189	2.189	2.035	1.767	1.801	1.771	1.383	2.043	1.571	2.081	1.529	2.202	1.6	2.244	1.579	2.227	1.491	2.603	1.717	2.486	1.918	2.42062
aeg 275	Ae.aegypti	Lucknow	Ashutosh nagar	LK_08	26°48'03.8"N	80°52'51.5"E	2.349	1.354	3.213	2.026	3.276	2.181	3.259	2.302	3.18	2.352	3.025	2.369	2.808	2.352	2.503	2.248	2.127	2.135	1.646	1.913	1.617	1.466	1.959	1.638	2.018	1.583	2.143	1.667	2.193	1.633	2.206	1.558	2.549	1.717	2.427	1.934	2.6474
aeg 276	Ae.aegypti	Lucknow	Ashutosh nagar	LK_08	26°48'03.8"N	80°52'51.5"E	2.399	1.12	3.443	1.399	3.535	1.47	3.585	1.608	3.56	1.709	3.401	1.784	3.171	1.842	2.879	1.884	2.486	1.905	1.943	1.888	1.759	1.5	2.131	1.533	2.147	1.45	2.298	1.462	2.335	1.404	2.298	1.328	2.666	1.349	2.666	1.6	2.65752
