# Supplementary material for: Effects of regional climatic conditions on the wing morphometrics of the dengue vector Aedes aegypti (Diptera: Culicidae) in India
Source: Research Square preprint supplement (doi:10.21203/rs.3.rs-7937635/v1), 2025-11-18
Supplement: Supplementary file 2 [file c22eed6927a538d66385ff41.docx]

| **Location/Climatic regions** | **Profile Soil moisture (StoB)** | **Root Soil moisture (100cm)** | **Soil moisture Surface (5cm)** | **Precipitation (mm/day)** | **RH** | **Tmean** | **T2max** | **Tmin** | **DTR** |
| --- | --- | --- | --- | --- | --- | --- | --- | --- | --- |
| Visakhapatnam | 0.43 | 0.44 | 0.48 | 3.31 | 76.01 | 27.41 | 30.12 | 25.24 | 4.88 |
| Kolkata | 0.67 | 0.67 | 0.64 | 4.14 | 72.20 | 25.85 | 31.36 | 21.23 | 10.13 |
| Nagpur | 0.69 | 0.69 | 0.56 | 3.27 | 55.26 | 26.84 | 33.50 | 20.74 | 12.76 |
| Raipur | 0.61 | 0.60 | 0.55 | 3.49 | 60.21 | 25.95 | 32.11 | 20.40 | 11.70 |
| **Tropical Wet and Dry** | 0.60 | 0.60 | 0.56 | 3.55 | 65.92 | 26.51 | 31.77 | 21.90 | 9.87 |
| Jodhpur | 0.40 | 0.40 | 0.24 | 0.94 | 37.03 | 26.59 | 34.27 | 19.83 | 14.43 |
| Sri Ganganagar | 0.39 | 0.38 | 0.24 | 0.85 | 34.01 | 26.99 | 34.56 | 20.18 | 14.38 |
| **Arid** | 0.40 | 0.39 | 0.24 | 0.89 | 35.52 | 26.79 | 34.41 | 20.01 | 14.41 |
| Kota | 0.54 | 0.54 | 0.39 | 1.94 | 45.32 | 25.75 | 32.97 | 19.34 | 13.63 |
| Hoshiarpur | 0.41 | 0.42 | 0.37 | 2.09 | 43.51 | 24.98 | 32.02 | 19.11 | 12.91 |
| **Semi-Arid** | 0.48 | 0.48 | 0.38 | 2.02 | 44.42 | 25.36 | 32.50 | 19.23 | 13.27 |
| Itanagar | 0.72 | 0.70 | 0.72 | 5.70 | 74.71 | 22.24 | 26.91 | 18.17 | 8.75 |
| Guwahati | 0.78 | 0.75 | 0.77 | 5.06 | 74.88 | 22.95 | 29.13 | 18.24 | 10.89 |
| Lucknow | 0.46 | 0.47 | 0.42 | 2.63 | 50.04 | 25.90 | 32.70 | 19.87 | 12.83 |
| **Humid Sub tropical** | 0.65 | 0.64 | 0.64 | 4.46 | 66.54 | 23.70 | 29.58 | 18.76 | 10.82 |
| Srinagar  **Mountain** | 0.52 | 0.54 | 0.53 | 2.09 | 54.63 | 9.15 | 15.32 | 3.73 | 11.60 |

**Supplementary Table S1: Environmental parameters of *Ae. aegypti* sampled populations and climatic regions.**
